# Supplementary material for: Diagnostic accuracy of the Geriatric Depression Scale-30, Geriatric Depression Scale-15, Geriatric Depression Scale-5 and Geriatric Depression Scale-4 for detecting major depression: protocol for a systematic review and individual participant data meta-analysis
Source: PubMed Central journal article supplement — BMJ Open. 2018 Dec 4;8(12):e026598. doi: 10.1136/bmjopen-2018-026598 (PMC6286470; doi:10.1136/bmjopen-2018-026598), 2018-12-04
Supplement: bmjopen-2018-026598.draft_revisions.pdf [file bmjopen-2018-026598.draft_revisions.pdf]

# BMJ Open

BMJ Open is committed to open peer review. As part of this commitment we make the peer review history of every article we publish publicly available.

When an article is published we post the peer reviewers' comments and the authors' responses online. We also post the versions of the paper that were used during peer review. These are the versions that the peer review comments apply to.

The versions of the paper that follow are the versions that were submitted during the peer review process. They are not the versions of record or the final published versions. They should not be cited or distributed as the published version of this manuscript.

BMJ Open is an open access journal and the full, final, typeset and author-corrected version of record of the manuscript is available on our site with no access controls, subscription charges or pay-per-view fees (<http://bmjopen.bmj.com>).

If you have any questions on BMJ Open's open peer review process please email [info.bmjopen@bmj.com](mailto:info.bmjopen@bmj.com)

# BMJ Open

## Diagnostic Accuracy of the Geriatric Depression Scale-30, Geriatric Depression Scale-15, Geriatric Depression Scale-5, and Geriatric Depression Scale-4 for Detecting Major Depression: Protocol for a Systematic Review and Individual Participant Data Meta-Analysis

|                               |                                                                                                                                                                                                                                                                                                                                                                                                                                                                                                                                                                                                                                                                                                                                                                                                                                                                                                                                                                                                                                                                                                                                                                                                                                                                                                                                                                                                                                                                                                                                                                                                                                                                                                                                                                                                                                                                                                                                                                                         |
|-------------------------------|-----------------------------------------------------------------------------------------------------------------------------------------------------------------------------------------------------------------------------------------------------------------------------------------------------------------------------------------------------------------------------------------------------------------------------------------------------------------------------------------------------------------------------------------------------------------------------------------------------------------------------------------------------------------------------------------------------------------------------------------------------------------------------------------------------------------------------------------------------------------------------------------------------------------------------------------------------------------------------------------------------------------------------------------------------------------------------------------------------------------------------------------------------------------------------------------------------------------------------------------------------------------------------------------------------------------------------------------------------------------------------------------------------------------------------------------------------------------------------------------------------------------------------------------------------------------------------------------------------------------------------------------------------------------------------------------------------------------------------------------------------------------------------------------------------------------------------------------------------------------------------------------------------------------------------------------------------------------------------------------|
| Journal:                      | <i>BMJ Open</i>                                                                                                                                                                                                                                                                                                                                                                                                                                                                                                                                                                                                                                                                                                                                                                                                                                                                                                                                                                                                                                                                                                                                                                                                                                                                                                                                                                                                                                                                                                                                                                                                                                                                                                                                                                                                                                                                                                                                                                         |
| Manuscript ID                 | bmjopen-2018-026598                                                                                                                                                                                                                                                                                                                                                                                                                                                                                                                                                                                                                                                                                                                                                                                                                                                                                                                                                                                                                                                                                                                                                                                                                                                                                                                                                                                                                                                                                                                                                                                                                                                                                                                                                                                                                                                                                                                                                                     |
| Article Type:                 | Protocol                                                                                                                                                                                                                                                                                                                                                                                                                                                                                                                                                                                                                                                                                                                                                                                                                                                                                                                                                                                                                                                                                                                                                                                                                                                                                                                                                                                                                                                                                                                                                                                                                                                                                                                                                                                                                                                                                                                                                                                |
| Date Submitted by the Author: | 10-Sep-2018                                                                                                                                                                                                                                                                                                                                                                                                                                                                                                                                                                                                                                                                                                                                                                                                                                                                                                                                                                                                                                                                                                                                                                                                                                                                                                                                                                                                                                                                                                                                                                                                                                                                                                                                                                                                                                                                                                                                                                             |
| Complete List of Authors:     | <p>Benedetti, Andrea; McGill University, Departments of Medicine and of Epidemiology, Biostatistics &amp; Occupational Health; McGill University Health Centre, Respiratory Epidemiology and Clinical Research Unit</p> <p>Wu, Yin; McGill University, Departments of Psychiatry and of Epidemiology, Biostatistics &amp; Occupational Health; Jewish General Hospital, Lady Davis Institute for Medical Research</p> <p>Levis, Brooke; McGill University, Department of Epidemiology, Biostatistics &amp; Occupational Health; Jewish General Hospital, Lady Davis Institute for Medical Research</p> <p>Wilchesky, Machel ; McGill University, Departments of Medicine and of Family Medicine; Jewish General Hospital, Lady Davis Institute for Medical Research</p> <p>Boruff, Jill; McGill University, Schulich Library of Science and Engineering</p> <p>Ioannidis, John; Stanford University, USA, Stanford Prevention Research Center, Departments of Medicine and of Health Research &amp; Policy</p> <p>Patten, Scott ; University of Calgary, Departments of Community Health Sciences and of Psychiatry</p> <p>Cuijpers, Pim; VU University Amsterdam, Department of Clinical, Neuro and Developmental Psychology and Amsterdam Public Health research institute</p> <p>Shrier, Ian; McGill University, Department of Epidemiology, Biostatistics &amp; Occupational Health; Jewish General Hospital, Lady Davis Institute for Medical Research</p> <p>Gilbody, Simon; The University of York, Department of Health Sciences</p> <p>Ismail, Zahinoor; University of Calgary, Departments of Community Health Sciences, of Psychiatry and of Clinical Neurosciences</p> <p>McMillan, Dean; University of York, Department of Health Sciences</p> <p>Mitchell, Nicholas; University of Alberta, Department of Psychiatry</p> <p>Ziegelstein, Roy; Johns Hopkins University School of Medicine, Department of Medicine</p> <p>Thombs, Brett; McGill University, Psychiatry</p> |
| Keywords:                     | depression, Geriatric Depression Scale, GDS, diagnostic test accuracy, individual participant data meta-analysis                                                                                                                                                                                                                                                                                                                                                                                                                                                                                                                                                                                                                                                                                                                                                                                                                                                                                                                                                                                                                                                                                                                                                                                                                                                                                                                                                                                                                                                                                                                                                                                                                                                                                                                                                                                                                                                                        |
|                               |                                                                                                                                                                                                                                                                                                                                                                                                                                                                                                                                                                                                                                                                                                                                                                                                                                                                                                                                                                                                                                                                                                                                                                                                                                                                                                                                                                                                                                                                                                                                                                                                                                                                                                                                                                                                                                                                                                                                                                                         |

1  
2  
3  
4  
5  
6  
7  
8  
9  
10  
11  
12  
13  
14  
15  
16  
17  
18  
19  
20  
21  
22  
23  
24  
25  
26  
27  
28  
29  
30  
31  
32  
33  
34  
35  
36  
37  
38  
39  
40  
41  
42  
43  
44  
45  
46  
47  
48  
49  
50  
51  
52  
53  
54  
55  
56  
57  
58  
59  
60

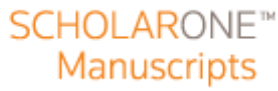

1  
2  
3 **Diagnostic Accuracy of the Geriatric Depression Scale-30, Geriatric Depression Scale-15,**  
4 **Geriatric Depression Scale-5, and Geriatric Depression Scale-4 for Detecting Major**  
5 **Depression: Protocol for a Systematic Review and Individual Participant Data Meta-**  
6 **Analysis**  
7  
8  
9  
10  
11  
12  
13  
14

15 Andrea Benedetti, PhD<sup>1-3</sup>; Yin Wu, PhD<sup>2,4,5</sup>; Brooke Levis, MSc<sup>2,5</sup>; Machelles Wilchesky,  
16 PhD<sup>3,5,6</sup>; Jill Boruff, MLIS<sup>7</sup>; John P. A. Ioannidis, MD, DSc<sup>8,9</sup>; Scott B. Patten, MD, PhD<sup>10,11</sup>;  
17 Pim Cuijpers, PhD<sup>12</sup>; Ian Shrier, MD, PhD<sup>2,5</sup>; Simon Gilbody, DPhil, FRCPsych<sup>13</sup>; Zahinoor  
18 Ismail, MD FRCPC<sup>10,11,14</sup>; Dean McMillan, PhD<sup>13</sup>; Nicholas Mitchell, MD, MSc<sup>15</sup>; Roy C.  
19 Ziegelstein, MD<sup>16</sup>; Brett D. Thombs, PhD<sup>2-5,17,18</sup>  
20  
21  
22  
23  
24  
25  
26  
27

28 <sup>1</sup>Respiratory Epidemiology and Clinical Research Unit, McGill University Health Centre,  
29 Montreal, Quebec, Canada; Departments of <sup>2</sup>Epidemiology, Biostatistics and Occupational  
30 Health; <sup>3</sup>Medicine; and <sup>4</sup>Psychiatry; McGill University, Montreal, Quebec, Canada; <sup>5</sup>Lady Davis  
31 Institute for Medical Research, Jewish General Hospital, Montreal, Quebec, Canada;  
32  
33 <sup>6</sup>Department of Family Medicine, McGill University, Montreal, Quebec, Canada; <sup>7</sup>Schulich  
34 Library of Physical Sciences, Life Sciences, and Engineering, McGill University, Montreal,  
35 Quebec, Canada; <sup>8</sup>Stanford Prevention Research Center, Department of Medicine, and  
36 Department of Health Research and Policy, Stanford School of Medicine; Stanford, California,  
37 USA; <sup>9</sup>Department of Statistics, Stanford University School of Humanities and Sciences,  
38 Stanford, California, USA; Departments of <sup>10</sup>Community Health Sciences and <sup>11</sup>Psychiatry,  
39 University of Calgary, Calgary, Canada; <sup>12</sup>Department of Clinical, Neuro and Developmental  
40 Psychology and Amsterdam Public Health research institute, Vrije Universiteit Amsterdam, The  
41  
42  
43  
44  
45  
46  
47  
48  
49  
50  
51  
52  
53  
54  
55  
56  
57  
58  
59  
60

1  
2  
3 Netherlands; <sup>13</sup>Hull York Medical School and Department of Health Sciences, University of  
4 York, York, UK; <sup>14</sup>Department of Clinical Neurosciences, University of Calgary, Calgary,  
5  
6  
7 Edmonton, Canada; <sup>15</sup>Department of Psychiatry, University of Alberta, Edmonton, Canada;  
8  
9  
10 <sup>16</sup>Department of Medicine, Johns Hopkins University School of Medicine, Baltimore, Maryland,  
11  
12 USA; Departments of <sup>17</sup>Psychology and <sup>18</sup>Educational and Counselling Psychology; McGill  
13  
14 University, Montreal, Quebec, Canada.  
15  
16  
17  
18

19 **Addresses for Correspondence:**

20  
21 Andrea Benedetti, PhD; 5252 de Maisonneuve Blvd. West; Montreal, Quebec, Canada H4A 3S5;  
22  
23 Tel (514) 934-1934 ext. 32161; E-mail: andrea.benedetti@mcgill.ca  
24  
25  
26  
27

28 Brett D. Thombs, PhD; 4333 Cote Ste Catherine Road; Montreal, Quebec, Canada H3T 1E4; Tel  
29  
30 (514) 340-8222 ext. 25112; E-mail: brett.thombs@mcgill.ca.  
31  
32  
33  
34

35 **Key Words:** depression; Geriatric Depression Scale; GDS; diagnostic test accuracy; individual  
36  
37 participant data meta-analysis.  
38  
39  
40  
41

42 **Word Count:** 3,002  
43  
44  
45  
46  
47  
48  
49  
50  
51  
52  
53  
54  
55  
56  
57  
58  
59  
60

## ABSTRACT

**Introduction:** The thirty-item Geriatric Depression Scale (GDS-30) and the shorter GDS-15, GDS-5 and GDS-4 are recommended as depression screening tools for elderly individuals. Existing meta-analyses on the diagnostic accuracy of the GDS have not been able to conduct subgroup analyses, have included patients already identified as depressed who would not be screened in practice, and have not accounted for possible bias due to selective reporting of results from only better-performing cutoffs in primary studies. Individual participant data meta-analysis (IPDMA), which involves a standard systematic review, then a synthesis of individual participant data, rather than summary results, could address these limitations. The objective of our IPDMA is to generate accuracy estimates to detect major depression for all possible cutoffs of each version of the GDS among studies using different reference standards, separately, and among participant subgroups based on age, sex, dementia diagnosis, and care settings. In addition, we will use a modelling approach to generate individual participant probabilities for major depression based on GDS scores (rather than a dichotomous cutoff) and participant characteristics (e.g., sex, age, dementia status, care setting).

**Methods and Analysis:** Individual participant data comparing GDS scores to a major depression diagnosis based on a validated structured or semi-structured diagnostic interview will be sought via a systematic review. Data sources will include Medline, Medline In-Process & Other Non-Indexed Citations, PsycINFO, and Web of Science. Bivariate random-effects models will be used to estimate diagnostic accuracy parameters for each cutoff of the different versions of the GDS. Pre-specified subgroup analyses will be conducted. Risk of bias will be assessed with the Quality Assessment of Diagnostic Accuracy Studies-2 tool.

1  
2  
3 **Ethics and Dissemination:** The findings of this study will be of interest to stakeholders involved  
4  
5 in research, clinical practice and policy.  
6

7 **Systematic Review Registration:** PROSPERO (CRD42018104329)  
8  
9  
10  
11  
12  
13  
14  
15  
16  
17  
18  
19  
20  
21  
22  
23  
24  
25  
26  
27  
28  
29  
30  
31  
32  
33  
34  
35  
36  
37  
38  
39  
40  
41  
42  
43  
44  
45  
46  
47  
48  
49  
50  
51  
52  
53  
54  
55  
56  
57  
58  
59  
60

For peer review only

## STRENGTHS AND LIMITATIONS OF THIS STUDY

- This study will use individual participant data to estimate diagnostic accuracy for all relevant cutoff scores of the different versions of the Geriatric Depression Scale (GDS). Using data from all participants at each cutoff score will overcome limitations related to selective cutoff reporting in primary study publications.
- This study will conduct analyses that exclude patients with current diagnoses of depression or who are undergoing mental health treatment, including antidepressants, at the time of study enrolment, as these patients would not be screened in clinical practice. This will overcome potential bias in primary diagnostic test accuracy studies where these patients are often included.
- This study will include subgroup analyses of diagnostic accuracy across different reference standards and by participant characteristics (e.g., sex, age, dementia status, care setting).
- A potential limitation is that the success of the study depends on the ability to obtain the relevant individual participant data and to avoid selective availability of studies with better or worse accuracy results. We do not know the proportion of eligible datasets that will be possible to include in the study.



## BACKGROUND

Major depression is present in 5-10% of the geriatric population internationally.[1,2] Effective treatments for depression are available, but identification is often haphazard. Physicians may fail to recognize up to half of all patients with depression, and most patients with depression do not receive minimally adequate care.[3-4] At the same time, there is a high rate of overdiagnosis and overtreatment, and the majority of patients who are treated do not meet diagnostic criteria.[5-7] Diagnosis of elderly individuals can be particularly difficult for clinicians due to factors such as cognitive impairments, social stigma, medical comorbidity, and atypical or vague clinical presentation.[1,8,9]

Some Canadian and international geriatric care organizations recommend screening elderly adults for depression,[10-13] but the Canadian Task Force for Preventive Health Care (CTFPHC), for instance, does not recommend depression screening, including for geriatric individuals.[14] The CTFPHC has expressed concern that published studies may overstate the accuracy of depression screening tools and that screening could lead to high rates of false positive tests, and still not improve depression outcomes.[14]

The thirty-item Geriatric Depression Scale (GDS-30), and the GDS-15, GDS-5 and GDS-4, which are fifteen-item, five-item and four-item subsets of the GDS-30, are commonly recommended as depression screening tools for elderly individuals.[15-17] As with other depression screening tools, primary studies on the diagnostic accuracy of the different versions of the GDS have been limited by (1) small samples; (2) the selective reporting of results for cutoffs when they perform well in a given sample, but not when they perform poorly; (3) the inclusion of patients already known by clinicians to have depression; and (4) the inability to conduct subgroup analyses (e.g., different age groups, dementia diagnosis, care settings) due to

1  
2  
3 small sample sizes. Conventional meta-analyses of the GDS or short versions of the GDS that  
4 have synthesized published summary data have not been able to conduct subgroup analyses or  
5  
6 exclude already-diagnosed patients,[15,16,18] and concerns have been raised about bias in these  
7  
8 meta-analyses due to selective cutoff reporting in primary studies that could not be addressed.[18]  
9

10  
11  
12 Individual participant data meta-analysis (IPDMA), which involves a standard systematic  
13 review, followed by synthesis of actual participant data from primary studies, rather than  
14  
15 aggregating summary data, can address these problems by including actual participant data from  
16  
17 all studies.[19,20] In the context of evaluating the diagnostic accuracy of depression screening  
18  
19 tools, IPDMA has three major advantages compared to conventional meta-analyses. First, for the  
20  
21 conventional binary screening approach, IPDMA can address bias from the selective publication  
22  
23 of diagnostic accuracy results for well-performing cutoffs from small studies since accuracy can  
24  
25 be evaluated across all relevant cutoffs for all participants. Second, IPDMA allows the  
26  
27 appropriate exclusion of already-diagnosed or already-treated patients when primary studies have  
28  
29 data on existing diagnoses and treatment. Third, an IPDMA with large numbers of participants  
30  
31 and major depression cases would allow subgroup analyses by study-level factors (e.g., study  
32  
33 setting, risk of bias factors) and individual factors that may influence screening accuracy (e.g.,  
34  
35 age, sex, dementia diagnosis). Finally, a large IPD database would allow the development of a  
36  
37 predictive algorithm to generate estimates of the probability of having major depression based on  
38  
39 participant characteristics and actual GDS scores, rather than binary classifications of individuals  
40  
41 as simply negative or positive based on screening results. This is important because, for instance,  
42  
43 an individual with a score of 0 on the GDS-30, may have a lower likelihood of having depression  
44  
45 than an individual with a substantially higher, but sub-cutoff, score of 10. Using a dichotomous  
46  
47  
48  
49  
50  
51  
52  
53  
54  
55  
56  
57  
58  
59  
60

1  
2  
3 cutoff method, however, both would be classified as negative screens and assigned the same  
4  
5 probability of having depression.  
6

7  
8 One of the downsides of IPDMAs is that they are resource intensive. In addition, if the  
9  
10 primary datasets obtained are not representative of all primary studies, the IPDMA could be  
11  
12 biased.[19-22] In a previous IPDMA of the Patient Health Questionnaire-9 (PHQ-9) screening  
13  
14 tool, which was the first IPDMA of the diagnostic accuracy of a depression screening tool,[23]  
15  
16 we were able to synthesize 58 of 72 eligible primary datasets (17,357 participants, 2,312 major  
17  
18 depression cases). This suggests that investigators are generally able and willing to provide  
19  
20 primary data from studies of the diagnostic accuracy of depression screening tools for use in  
21  
22 IPDMA. A preliminary PubMed search for the GDS verified the existence of enough primary  
23  
24 studies (more than 100 potentially eligible datasets that appear to have at least 30,000  
25  
26 participants, 4,000 cases) to make IPDMA feasible for the GDS.  
27  
28  
29

30  
31 Thus, the objectives of this IPDMA are to evaluate the diagnostic accuracy of the GDS-30,  
32  
33 GDS-15, GDS-5 and GDS-4 among studies using different reference standards, separately;  
34  
35 among participant subgroups based on age, sex, dementia diagnosis, and care settings; and  
36  
37 excluding participants identified as already-diagnosed or treated for depression. Furthermore, a  
38  
39 prediction model will be generated.  
40  
41

## 42 **METHODS AND ANALYSIS**

43

44  
45 This systematic review has been funded by the Canadian Institutes of Health Research  
46  
47 (Funding Reference Number PJT-156365). The protocol has been registered in the PROSPERO  
48  
49 prospective register of systematic reviews (CRD42018104329), and any changes to the study  
50  
51 protocol will be registered as amendments with PROSPERO.  
52  
53  
54  
55  
56  
57  
58  
59

1  
2  
3 The IPDMA has been designed and will be conducted in accordance with best-practice  
4 standards as elaborated in the Cochrane Handbook for Systematic Reviews of Diagnostic Test  
5 Accuracy[24] and other key sources.[19,20,25] Results will be reported in accordance with the  
6 Preferred Reporting Items for Systematic Reviews and Meta-Analyses of Diagnostic Test  
7 Accuracy Studies (PRISMA-DTA) statement and the PRISMA-IPD statement.[26,27] The  
8 IPDMA protocol does not deviate substantively from previous IPDMA protocols that we have  
9 developed and published for other depression screening tools.[23,28,29]

### 19 Sources of Evidence

21 The search strategy was developed by a medical librarian and was adapted from a search  
22 strategy developed for a similar systematic review to obtain datasets for IPDMA of the PHQ-9  
23 depression screening tool,[23] which was peer-reviewed using the Peer Review of the Electronic  
24 Search Strategy (PRESS) standard.[30] The search strategy is also similar to strategies that we  
25 have used for systematic reviews and IPDMA of the Hospital Anxiety and Depression Scale and  
26 Edinburgh Postnatal Depression Scale.[28,29]

35 We will search Medline, Medline In-Process & Other Non-Indexed Citations, PsycINFO  
36 (OvidSP platform), and Web of Science (Web of Knowledge platform). The Medline search  
37 strategy for the GDS was validated by testing against already-identified publications from our  
38 preliminary search. The strategy was then adapted for PsycINFO and Web of Science. We  
39 limited our search strategy to these databases based on research showing that adding other  
40 databases (e.g., EMBASE) when the Medline search is highly sensitive does not identify  
41 additional eligible studies.[31] The Cochrane Handbook for Systematic Reviews of Diagnostic  
42 Test Accuracy[24] suggests combining concepts of the index test and the target conditions, but  
43 this was redundant for depression screening tools as these tests are limited to testing for  
44  
45  
46  
47  
48  
49  
50  
51  
52  
53  
54  
55  
56  
57  
58  
59  
60

1  
2  
3 depression. Thus, the search strategy for electronic databases was comprised of two concepts: the  
4 index test of interest and studies of screening accuracy. There are no published search hedges  
5  
6 designed specifically for mental health screening, but key articles were consulted in developing  
7  
8 search terms.[32-34] See Supplementary File 1 for detailed information on searches. To  
9  
10 supplement electronic searches, we will search reference lists of included publications and  
11  
12 relevant reviews, conduct a related articles search using the PubMed “related articles” feature,  
13  
14 and query authors of included studies for unpublished studies. Search results will be uploaded  
15  
16 into the citation management database RefWorks (RefWorks-COS, Bethesda, MD, USA), and  
17  
18 the RefWorks duplicate check function will be used to identify citations retrieved from multiple  
19  
20 sources. Unique citations will then be uploaded into the systematic review program DistillerSR  
21  
22 (Evidence Partners, Ottawa, Canada), and DistillerSR will be used to store and track search  
23  
24 results and to track results of the review process.  
25  
26  
27  
28  
29

### 30 31 **Selection of Eligible Studies**

32  
33 To conduct the meta-analysis, we will seek primary datasets that allow us to compare  
34  
35 GDS scores to major depression diagnostic status. Datasets from articles in any language will be  
36  
37 sought for inclusion if they compare results from any version of the GDS to diagnoses of major  
38  
39 depressive disorder (MDD) or major depressive episode (MDE) made with a validated diagnostic  
40  
41 interview, administered within 2 weeks of the GDS and based on Diagnostic and Statistical  
42  
43 Manual (DSM) or International Classification of Diseases criteria (ICD), which are similar to  
44  
45 DSM criteria and generally used outside of North America.  
46  
47  
48

49 The two-week criterion was set because that is the duration of symptoms required for a  
50  
51 diagnosis of major depression. Datasets where some participants were administered the screening  
52  
53 tool within 2 weeks of the diagnostic interview and some participants were not will be included  
54  
55  
56  
57  
58  
59

1  
2  
3 if the original data allows us to identify and select eligible participants. Most primary studies use  
4  
5 MDD as the reference standard, but some may use MDE, which is identical with respect to the  
6  
7 symptoms of depression, but does not exclude participants with psychotic disorders or a history  
8  
9 of manic episodes. If both are available, we will record both and prioritize DSM over ICD and  
10  
11 MDE over MDD in analyses. Data from studies where all participants are known to have  
12  
13 psychiatric diagnoses, have been referred for mental health evaluation, or are undergoing  
14  
15 treatment for depression will be excluded, with the exception of participants treated for substance  
16  
17 use disorders, for whom depression screening may be considered. The coding manual for  
18  
19 inclusion and exclusion decisions is shown in Supplementary File 2.  
20  
21  
22

23  
24 Two investigators will review articles independently for eligibility. If either reviewer  
25  
26 determines that a study may be eligible based on title or abstract review, a full-text article review  
27  
28 will be completed. Disagreement between reviewers after full-text review will be resolved by  
29  
30 consensus, including a third investigator as necessary. Translators will be used to evaluate  
31  
32 titles/abstracts and articles for languages other than those for which team members are fluent.  
33  
34 See Supplementary File 3 for a preliminary PRISMA flow of studies figure.  
35  
36

### 37 **Transfer of Data and Data Management**

38  
39 Authors of studies containing datasets that meet inclusion criteria will be contacted to  
40  
41 invite them to contribute primary data for inclusion. Data will only be used from studies that  
42  
43 received ethics approval and all data that are transferred will be properly de-identified prior to  
44  
45 transfer. Participant data will be cleaned and coded for uniformity across datasets using an  
46  
47 already developed codebook, similar to codebooks used in our previous IPDMAs.[23,28,29]  
48  
49 Actual data coding and transfer from original studies into the IPD database will be done by a  
50  
51 supervised staff or trainee member of the team. Participant characteristics and screening  
52  
53  
54  
55  
56  
57  
58  
59  
60

1  
2  
3 accuracy results for each study using the cleaned datasets will be compared to those from the  
4  
5 original datasets to identify any potential discrepancies.  
6

7  
8 In addition to obtaining original participant-level data, data will also be extracted from  
9  
10 the published articles of included studies. We will crosscheck the published data with the  
11  
12 original participant-level data obtained from each dataset and any inconsistencies will be  
13  
14 discussed with the original authors. Corrections will be made as necessary.  
15

### 16 17 **Quality Assessment**

18  
19 Two reviewers will independently use the Quality Assessment of Diagnostic Accuracy  
20  
21 Studies-2 (QUADAS-2) tool[35] to assess risk of bias in primary studies. QUADAS-2  
22  
23 incorporates assessments of risk of bias across four core domains: participant selection, the index  
24  
25 test, the reference standard, and the flow and timing of assessments. Two reviewers will  
26  
27 independently assess risk of bias, and any discrepancies will be resolved by consensus.  
28  
29

### 30 31 **Data Analysis**

32  
33 Analyses will estimate sensitivity and specificity separately at each cutoff by bivariate  
34  
35 random-effects meta-analysis models as described in Riley et al.[36] For each GDS version, we  
36  
37 will fit these models, estimated via Gaussian Hermite adaptive quadrature, for the full range of  
38  
39 plausible GDS cutoff values.[36] This approach models sensitivity and specificity  
40  
41 simultaneously and accounts for the precision of estimates within studies.[36] Data from all  
42  
43 included primary studies will be analyzed simultaneously with a random-effects model as  
44  
45 sensitivity and specificity are assumed to vary across primary studies. We will also construct a  
46  
47 pooled ROC curve and identify the optimal cutoff.[36] We will compare results that only include  
48  
49 datasets that allow the exclusion of patients diagnosed with depression or receiving depression  
50  
51 treatment (including antidepressants with reason unspecified) with results that also include  
52  
53  
54  
55  
56  
57  
58  
59  
60

1  
2  
3 studies where these data are not available. For assessment of each version, we will include  
4  
5 studies that report total scores for the specific GDS version or individual GDS item scores from  
6  
7 longer versions of the GDS which could be used to calculate total scores for the shorter version.  
8  
9 We will consider imputation if a large part of data is missing.  
10  
11

12 In a previous IPDMA with the PHQ-9,[37] we found that reference standards appeared to  
13  
14 perform differently. The Mini International Neuropsychiatric Interview (MINI) is fully  
15  
16 structured, but was designed for very rapid administration and described as its authors as being  
17  
18 over-inclusive as a result. We found that, controlling for depressive symptom scores, the MINI  
19  
20 classified approximately twice as many participants with major depression as other fully  
21  
22 structured interviews.[38,39] Compared to semi-structured interviews, which are intended to be  
23  
24 done by experienced diagnosticians and involve some clinical judgment (e.g., Structured Clinical  
25  
26 Interview for DSM Disorders) fully structured interviews (MINI excluded), diagnosed more  
27  
28 participants with low symptom levels as depressed and fewer participants with higher symptom  
29  
30 levels. Fully structured interviews can be delivered by lay interviewers and are intended to  
31  
32 achieve a high level of standardization, but may sacrifice accuracy.[40-43] Thus, we will assess  
33  
34 possible differences and evaluate sensitivity and specificity separately by reference standard.  
35  
36  
37  
38  
39

40 In secondary analyses, to the extent that there are sufficient data, we will investigate  
41  
42 subgroups according to age, sex, dementia status and severity, dementia subtype, number of  
43  
44 medical comorbidities (with specific comorbidities integrated to the extent possible), care setting  
45  
46 and risk of bias. QUADAS-2 factors that will be considered include patient selection factors,  
47  
48 blinding of reference standard to index test results, and timing between administration of index  
49  
50 test and reference standard (e.g., 0 to 7 days, 7 to 14 days). Additionally, a subgroup analysis  
51  
52  
53  
54  
55  
56  
57  
58  
59  
60



1  
2  
3 will be conducted that includes only data from countries listed as “very high development” on  
4  
5 the United Nation’s Human Development Index.[44]  
6

7  
8 If there is a sufficient number of studies with published diagnostic accuracy data for major  
9  
10 depression that are eligible but do not provide data, studies included in the IPDMA will be  
11  
12 compared to eligible studies that do not provide data in terms of sensitivity and specificity, using  
13  
14 published summary data from the studies that do not provide data. Depending on the number of  
15  
16 missing studies, a sensitivity analysis may also be conducted that includes aggregate summary  
17  
18 estimates of sensitivity and specificity from the studies that do not provide individual participant  
19  
20 data in the main meta-analysis, along with data from studies that contribute to the IPDMA.[36] If  
21  
22 there are a large number of studies that do not contribute primary data, this analysis may become  
23  
24 the primary analysis.  
25  
26

27  
28 Clinical predictive models have not been used previously to generate individualized  
29  
30 probabilities that an individual has major depression based on screening tool scores and  
31  
32 participant characteristics. There is a rich tradition of using predictive models for risk scores or  
33  
34 classifying patients based on diagnostic tests, and our approach will build upon those  
35  
36 traditions.[45-50] To do this, we will develop binary predictive models that use GDS scores as  
37  
38 well as key participant characteristics (e.g., sex, age, dementia status, care setting) to estimate the  
39  
40 probability and associated 95% CI that an individual has major depression. We will estimate  
41  
42 logistic mixed models and then integrate over the distribution of the random effects as described  
43  
44 in Pavlou et al. and Skrandal et al.[54,55] Continuous variables (GDS score and age) will be  
45  
46 modeled using flexible semi-parametric methods (e.g., regression splines). We will consider the  
47  
48 inclusion of interaction terms. The models will be evaluated in terms of their overall  
49  
50 performance (Nagelkerke’s  $R^2$ , Brier score), calibration (e.g., slope of linear predictor; are  
51  
52  
53  
54  
55  
56  
57  
58  
59  
60

1  
2  
3 average, low and high predictions correct) and discrimination (e.g., c-statistic; discrimination  
4 slope: can we separate subjects with and without major depression).[45,46] Validation with the  
5 same subjects used to develop a model results in overly optimistic performance. We will assess  
6 internal validation via the bootstrap method, which has been shown to be preferable to split  
7 sample validation approaches.[47] Although there are advantages to external validation, given  
8 the wide range of study populations that we will be using, it would be unlikely that there would  
9 be another comparable data set large enough for validation. Thus, assessment of internal validity  
10 via bootstrapping will allow us to understand how our model may perform in a clinical setting,  
11 and by adjusting our regression coefficients for optimism, the performance of our model will be  
12 as accurate as possible. In sensitivity analyses, we will explore including each item from the  
13 GDS questionnaires as a separate predictor variable, rather than only the total score.  
14  
15  
16  
17  
18  
19  
20  
21  
22  
23  
24  
25  
26  
27  
28  
29  
30

## 31 **ETHICS AND DISSEMINATION**

32  
33 This IPDMA does not require ethics approval, although only individual studies that  
34 obtained ethical clearance and informed consent will be included. The reason that the IPDMA  
35 does not require ethics review is that the objectives of the IPDMA are consistent with the  
36 objectives of the primary studies, which already received ethics approval, and only anonymized  
37 data will be provided by the investigators of the original studies.  
38  
39  
40  
41  
42  
43  
44

45 The main outcomes of the IPDMA reflect knowledge that will influence future research,  
46 clinical practice, and policy. Strategies for effective dissemination and specific outputs will be  
47 based on research showing how to best tailor research outputs to different user groups,[18,48-52]  
48 including research on improving the usefulness of reports of systematic review and meta-  
49 analyses for health care managers and policy makers.[50,52] Dissemination will include  
50  
51  
52  
53  
54  
55  
56  
57  
58  
59  
60

1  
2  
3 publication of results in high-impact medical journals with open access, as well as presentations  
4  
5 in seminars and symposia to policy-makers, health care providers, and researchers at national  
6  
7 and international conferences.  
8  
9

10 If the predictive model performs well, a free and easy-to use online calculation tool will be  
11  
12 created to incorporate individual characteristics into accuracy estimates and provide users of our  
13  
14 research with probabilities that individual patients have depression based on their GDS score and  
15  
16 key characteristics. The calculator will be similar to other successful tools, such as the FRAX®  
17  
18 Fracture Risk Assessment Tool (<http://www.shef.ac.uk/FRAX/index.aspx>). The tool that will be  
19  
20 made from the results of this study will be modeled on this tool and presented with tablet and app  
21  
22 versions.  
23  
24  
25  
26  
27

## 28 **AUTHORS' CONTRIBUTIONS**

29  
30 AB, YW, BL, MW, JB, JPAI, SBP, PC, IS, SG, ZI, DM, NM, RCZ, and BDT contributed  
31  
32 to the conception and design of the systematic review and meta-analysis. JB developed the  
33  
34 database search strategy. AB, YW, BL, MW, JB, and BDT will be involved in acquisition of  
35  
36 data. AB, YW, BL, and BDT will analyze the data. All authors will contribute to the  
37  
38 interpretation of results. AB, YW, and BDT drafted this protocol. All authors provided critical  
39  
40 revisions of the protocol and approved submission of the final manuscript. AB is the guarantor.  
41  
42  
43  
44  
45  
46

## 47 **FUNDING STATEMENT**

48  
49 This research is supported by a grant from the Canadian Institutes of Health Research  
50  
51 (CIHR; Funding Reference Number PJT-156365; PIs = Benedetti, Thombs, Wilchesky). Drs.  
52  
53 Benedetti and Thombs are supported by the Fonds de recherche du Québec - Santé (FRQS)  
54  
55  
56  
57  
58  
59  
60

1  
2  
3 researcher salary award. Dr. Wu is supported by an Utting Postdoctoral Fellowship from the  
4  
5 Jewish General Hospital, Montreal, Quebec. Ms. Levis is supported by a CIHR Frederick  
6  
7 Banting and Charles Best Canada Graduate Scholarship doctoral award. Dr. Patten is a Senior  
8  
9 Health Scholar with Alberta Innovates, Health Solutions. Dr. Ismail receives funding from the  
10  
11 Alzheimer Society Calgary via the Hotchkiss Brain Institute. Dr. Wilchesky is supported by the  
12  
13 Donald Berman Maimonides Medical Research Foundation. No funding body had any input into  
14  
15 any aspect of this protocol.  
16  
17  
18  
19  
20

## 21 **COMPETING INTERESTS STATEMENT**

22  
23  
24 The authors have read and understood the BMJ policy on declaration of interests and  
25  
26 declare that they have no competing interests.  
27  
28  
29  
30  
31  
32  
33  
34  
35  
36  
37  
38  
39  
40  
41  
42  
43  
44  
45  
46  
47  
48  
49  
50  
51  
52  
53  
54  
55  
56  
57  
58  
59  
60

**REFERENCES**

1. Fiske A, Wetherell JL, Gatz M. Depression in older adults. *Annu Rev Clin Psychol* 2009;5:363-89.
2. Luppá M, Sikorski C, Luck T, et al. Age- and gender-specific prevalence of depression in latest-life – Systematic review and meta-analysis. *J Affect Disord* 2012;136:212-221.
3. Duhoux A, Fournier L, Nguyen CT, Roberge P, Beveridge R. Guideline concordance of treatment for depressive disorders in Canada. *Soc Psychiatry Psychiatr Epidemiol* 2009;44:385-392.
4. Duhoux A, Fournier L, Gauvin L, Roberge P. What is the association between quality of treatment for depression and patient outcomes? A cohort study of adults consulting in primary care. *J Affect Disord* 2013;151:265-274.
5. Mojtabai R, Olfson M. Proportion of antidepressants prescribed without a psychiatric diagnosis is growing. *Health Aff* 2011;30:1434-1442.
6. Mojtabai R. Clinician-identified depression in community settings: Concordance with structured interview diagnoses. *Psychother Psychosom* 2013;82:161-169.
7. Olfson M, Blanco C, Marcus SC. Treatment of adult depression in the United States. *JAMA Intern Med* [Epub ahead of print].
8. Jeste DV, Alexopoulos GS, Bartels SJ, et al. Consensus statement on the upcoming crisis in geriatric mental health: research agenda for the next 2 decades. *Arch Gen Psychiatry* 1999;56:848-853.
9. Weeks R, Kalucy R, Hill J. Chapter 3: Depression in Elderly Patients. In: Jackson S, Jansen P, Mangoni A, eds. *Prescribing for Elderly Patients*. John Wiley & Sons, Ltd; 2009.

10. Registered Nurses Association of Ontario. *Screening for Delirium, Dementia, and Depression in Older Adults*. Toronto, Ontario: Registered Nurses Association of Ontario; 2003.
11. American Medical Directors Association (AMDA). *Depression in the long-term care setting*. Columbia, Maryland: American Medical Directors Association (AMDA); 2011.
12. American Geriatrics Society, American Association for Geriatric Psychiatry. Consensus statement on improving the quality of mental health care in U.S. nursing homes: management of depression and behavioral symptoms associated with dementia. *J Am Geriatr Soc*. 2003;51:1287-1298.
13. Buchanan D, Tourigny-Rivard M, Cappeliez P, et al. National guidelines for seniors' mental health: the assessment and treatment of depression. *Can J Geriatr* 2006;9:52-58.
14. Joffres M, Jaramillo A, Dickinson J, et al. Recommendations on screening for depression in adults. *CMAJ* 2013;185:775-782.
15. Mitchell AJ, Bird V, Rizzo M, et al. Which version of the geriatric depression scale is most useful in medical settings and nursing homes? Diagnostic validity meta-analysis. *Am J Geriatr Psychiatry* 2010;18:1066-1077.
16. Mitchell AJ, Bird V, Rizzo M, et al. Diagnostic validity and added value of the Geriatric Depression Scale for depression in primary care: a meta-analysis of GDS30 and GDS15. *J Affect Disord* 2010;125:10-17.
17. Montorio I, Izal M. The Geriatric Depression Scale: a review of its development and utility. *Int Psychogeriatr* 1996;8:103-112.

18. Pocklington C, Gilbody S, Manea L, McMillan D. The diagnostic accuracy of brief versions of the Geriatric Depression Scale: a systematic review and meta-analysis. *Int J Geriatr Psychiatry* 2016;31:837-857.
19. Riley RD, Lambert PC, Abo-Zaid G. Meta-analysis of individual participant data: rationale, conduct, and reporting. *BMJ* 2010;340:c221.
20. Stewart LA, Tierney JF, Clarke M. Chapter 18: Reviews of individual patient data. In: Higgins JPT, Green S, eds. *Cochrane Handbook for Systematic Reviews of Interventions*. Version 5.1.0. Chichester, England: Wiley-Blackwell; The Cochrane Collaboration 2011.
21. Jaspers GJ, Degraeuwe PLJ. A failed attempt to conduct an individual patient data meta-analysis. *Systematic Reviews* 2014;3:97.
22. Parish E, Bloom T, Godlee F. Statins for people at low risk. *BMJ* 2015;351:h3908.
23. Thombs BD, Benedetti A, Kloda LA, et al. The diagnostic accuracy of the Patient Health Questionnaire-2 (PHQ-2), Patient Health Questionnaire-8 (PHQ-8), and Patient Health Questionnaire-9 (PHQ-9) for detecting major depression: protocol for a systematic review and individual patient data meta-analyses. *Systematic Reviews* 2014;3:124.
24. Deeks JJ, Bossuyt PM, Gatsonis C. *Cochrane Handbook for Systematic Reviews of Diagnostic Test Accuracy Version 1.0.0*. The Cochrane Collaboration; 2009.
25. Higgins JPT, Green S. *Cochrane Handbook for Systematic Reviews of Interventions Version 5.1.0*. Chichester, England: Wiley-Blackwell; The Cochrane Collaboration 2011.
26. McInnes MD, Moher D, Thombs BD, et al. Preferred reporting items for a systematic review and meta-analysis of diagnostic test accuracy studies: the PRISMA-DTA statement. *JAMA* 2018; 319:388-96.

- 1  
2  
3 27. Stewart LA, Clarke M, Rovers M, et al. Preferred reporting items for a systematic review  
4 and meta-analysis of individual participant data: the PRISMA-IPD statement. *JAMA*  
5 2015;313:1657-65.  
6  
7
- 8  
9  
10 28. Thombs BD, Benedetti A, Kloda LA, et al. The diagnostic accuracy of the Hospital  
11 Anxiety and Depression Scale (HADS) for detecting major depression: Protocol for a  
12 systematic review and individual patient data meta-analyses. *BMJ Open* 2016; 6:e011913.  
13  
14
- 15 29. Thombs BD, Benedetti A, Kloda LA, et al. The diagnostic accuracy of the Edinburgh  
16 Postnatal Depression Scale (EPDS) for detecting major depression in pregnant and  
17 postnatal women: Protocol for a systematic Review and individual patient data meta-  
18 analyses. *BMJ Open* 2015;5:e009742.  
19  
20  
21  
22  
23  
24  
25
- 26 30. McGowan J, Sampson M, Salzwedel DM, Cogo E, Foerster V, Lefebvre C. PRESS peer  
27 review of electronic search strategies: 2015 guideline statement. *J Clin Epidemiology*  
28 2016;75:40-6.  
29  
30  
31  
32
- 33 31. Sampson M, Barrowman NJ, Moher D, et al. Should meta-analysts search Embase in  
34 addition to Medline? *J Clin Epidemiol* 2003;56:943-55.  
35  
36  
37
- 38 32. Mann R, Gilbody SM. Should methodological filters for diagnostic test accuracy studies be  
39 used in systematic reviews of psychometric instruments? A case study involving screening  
40 for postnatal depression. *Syst Rev* 2012;1:9,4053-1-9.  
41  
42  
43
- 44 33. Ingui BJ, Rogers MA. Searching for clinical prediction rules in MEDLINE. *J Am Med*  
45 *Inform Assoc* 2001;8:391-7.  
46  
47  
48
- 49 34. Wong SS, Wilczynski NL, Haynes RB, et al. Developing optimal search strategies for  
50 detecting sound clinical prediction studies in MEDLINE. *AMIA Annu Symp Proc*  
51 2003:728-32.  
52  
53  
54  
55  
56  
57  
58  
59  
60



- 1  
2  
3 35. Whiting PF, Rutjes AW, Westwood ME, et al. QUADAS-2: a revised tool for the quality  
4 assessment of diagnostic accuracy studies. *Ann Intern Med* 2011;155:529-36.  
5  
6
- 7 36. Riley RD, Dodd SR, Craig JV, et al. Meta-analysis of diagnostic test studies using  
8 individual patient data and aggregate data. *Stat Med* 2008;27:6111-36.  
9  
10
- 11 37. Levis B, Benedetti A, Riehm KE, et al. Probability of major depression diagnostic  
12 classification using semi-structured versus fully structured diagnostic interviews. *Br J*  
13 *Psychiatry* 2018;212:377-85.  
14  
15
- 16 38. Lecrubier Y, Sheehan DV, Weiller E et al. The Mini International Neuropsychiatric  
17 Interview (MINI). A short diagnostic structured interview: reliability and validity  
18 according to the CIDI. *Eur Psychiatry* 1997;12:224–231.  
19  
20
- 21 39. Sheehan DV, Lecrubier Y, Sheehan KH et al. The validity of the Mini International  
22 Neuropsychiatric Interview (MINI) according to the SCID-P and its reliability. *Eur*  
23 *Psychiatry* 1997;12:232–241.  
24  
25
- 26 40. Brugha TS, Jenkins R, Taub N, Meltzer H, Bebbington PE. A general population  
27 comparison of the Composite International Diagnostic Interview (CIDI) and the Schedules  
28 for Clinical Assessment in Neuropsychiatry (SCAN). *Psychol Medicine* 2001;31:1001–13.  
29  
30
- 31 41. Brugha TS, Bebbington PE, Jenkins R. A difference that matters: comparisons of  
32 structured and semi-structured psychiatric diagnostic interviews in the general population.  
33 *Psychol Med* 1999;29:1013-20.  
34  
35
- 36 42. Nosen E, Woody SR. Chapter 8: Diagnostic assessment in research. In, McKay D.  
37 *Handbook of research methods in abnormal and clinical psychology*. Sage; 2008.  
38  
39
- 40 43. Kurdyak PA, Gnam WH. Small signal, big noise: performance of the CIDI depression  
41 module. *Can J Psychiatry* 2005;50:851-56.  
42  
43  
44  
45  
46  
47  
48  
49  
50  
51  
52  
53  
54  
55  
56  
57  
58  
59  
60

- 1  
2  
3 44. United Nations Development Programme. *Human Development Report 2013. The Rise of*  
4  
5 *the South: Human Progress in a Diverse World*. New York, NY: United Nations  
6  
7 Development Programme; 2013.  
8  
9
- 10 45. Steyerberg EW. *Clinical Prediction Models*. New York: Springer; 2009.  
11
- 12 46. Steyerberg EW, Vickers AJ, Cook NR, et al. Assessing the performance of prediction  
13  
14 models: a framework for some traditional and novel measures. *Epidemiology* 2010;21:128-  
15  
16 38.  
17  
18
- 19 47. Steyerberg EW, Harrell FE, Jr, Borsboom GJ, et al. Internal validation of predictive  
20  
21 models: efficiency of some procedures for logistic regression analysis. *J Clin Epidemiol*  
22  
23 2001;54:774-81.  
24  
25
- 26 48. Rutjes AW, Reitsma JB, Di Nisio M, Smidt N, van Rijn JC, Bossuyt PM. Evidence of bias  
27  
28 and variation in diagnostic accuracy studies. *CMAJ* 2006;174:469-76.  
29  
30
- 31 49. Meijer A, Roseman M, Milette K, et al. Depression screening and patient outcomes in  
32  
33 cancer: A systematic review. *PLOS ONE* 2011;6:e27181.  
34  
35
- 36 50. Rice DB, Thombs BD. Risk of bias from inclusion of currently diagnosed or treated  
37  
38 patients in studies of depression screening tool accuracy: a cross-sectional analysis of  
39  
40 recently published primary studies and meta-analyses. *PLoS One* 2016;11:e0150067.  
41  
42
- 43 51. Stewart LA, Tierney JF, Clarke M. Chapter 18: Reviews of individual patient data. In:  
44  
45 Higgins JPT, Green S, eds. *Cochrane Handbook for Systematic Reviews of Interventions*.  
46  
47 Version 5.1.0 [updated March 2011]. Cochrane Collaboration, 2011.  
48  
49
- 50 52. Ahmed I, Sutton AJ, Riley RD. Assessment of publication bias, selection bias, and  
51  
52 unavailable data in meta-analyses using individual participant data: A database survey. *BMJ*  
53  
54 2012;344:d7762.  
55  
56  
57  
58

## SUPPLEMENTARY FILE 1: Search Strategies

### GDS screening accuracy

Researcher: Brett Thombs

Search strategy peer reviewed:

Database searches conducted:

Reference/related list searches conducted

| Search Terms                                                                                                                                                                                                                                                                                                                                                                                                                                                                                                                                                                       |                                                                                                                                                                                                                                                                                                                                                                                                                      |                                                                                                                                                                                                                                                                                                                                                  |
|------------------------------------------------------------------------------------------------------------------------------------------------------------------------------------------------------------------------------------------------------------------------------------------------------------------------------------------------------------------------------------------------------------------------------------------------------------------------------------------------------------------------------------------------------------------------------------|----------------------------------------------------------------------------------------------------------------------------------------------------------------------------------------------------------------------------------------------------------------------------------------------------------------------------------------------------------------------------------------------------------------------|--------------------------------------------------------------------------------------------------------------------------------------------------------------------------------------------------------------------------------------------------------------------------------------------------------------------------------------------------|
| GDS*<br>Geriatric Depression Scale*                                                                                                                                                                                                                                                                                                                                                                                                                                                                                                                                                |                                                                                                                                                                                                                                                                                                                                                                                                                      |                                                                                                                                                                                                                                                                                                                                                  |
| Search Terms:                                                                                                                                                                                                                                                                                                                                                                                                                                                                                                                                                                      |                                                                                                                                                                                                                                                                                                                                                                                                                      |                                                                                                                                                                                                                                                                                                                                                  |
| SCREENING ACCURACY                                                                                                                                                                                                                                                                                                                                                                                                                                                                                                                                                                 |                                                                                                                                                                                                                                                                                                                                                                                                                      |                                                                                                                                                                                                                                                                                                                                                  |
| Medline “filter”                                                                                                                                                                                                                                                                                                                                                                                                                                                                                                                                                                   | PsycINFO “filter”                                                                                                                                                                                                                                                                                                                                                                                                    | Web of Science “filter”                                                                                                                                                                                                                                                                                                                          |
| Mass Screening/<br>Psychiatric Status Rating Scales/<br>Predictive Value of Tests/<br>Reproducibility of Results/<br>Exp “Sensitivity and Specificity”/<br>Psychometrics/<br>Prevalence/<br>Reference Values/<br>Reference Standards/<br>Exp Diagnostic Errors/<br>Mental Disorders/diagnosis<br>Mood Disorders/diagnosis<br>Depressive Disorder/diagnosis<br>Depressive Disorder, Major/diagnosis<br>Depression, Postpartum/diagnosis<br>Depression/diagnosis<br><br>validation studies.pt.<br>comparative study.pt<br><br>screen*.af.<br>prevalence.af.<br>predictive value*.af. | Diagnosis/<br>Medical Diagnosis/<br>Psychodiagnosis/<br>Misdiagnosis/<br>Screening/<br>Health Screening/<br>Screening Tests/<br>Prediction/<br>Cutting Scores/<br>Psychometrics/<br>Test Validity/<br>screen*.af.<br>predictive value*.af.<br>detect*.ti.<br>sensitiv*.ti.<br>valid*.ti.<br>revalid*.ti.<br>accura*.ti.<br>psychometric*.ti.<br>specificit*.ab.<br>cut?off*.ab.<br>cut* score*.ab.<br>cut?point*.ab. | TS=<br>screen*<br>prevalence<br>“predictive value*”<br>detect*<br>sensitiv*<br>valid*<br>revalid*<br>predict*<br>accura*<br>psychometric*<br>identif* specificit*<br>cutoff*<br>“cut off*”<br>“cut* score*”<br>cutpoint*<br>“cut point*”<br>“threshold score*”<br>“reference standard*”<br>“reference test*”<br>“index test*”<br>“gold standard” |

|    |                         |                                      |
|----|-------------------------|--------------------------------------|
| 1  | detect*.ti.             | threshold score*.ab.                 |
| 2  | sensitiv*.ti.           | reference standard*.ab.              |
| 3  | valid*.ti.              | reference test*.ab.                  |
| 4  | revalid*.ti.            | index test*.ab                       |
| 5  | predict*.ti.            | gold standard.ab.                    |
| 6  | accura*.ti.             |                                      |
| 7  | psychometric*.ti.       | <del>Psychological Assessment/</del> |
| 8  | identif*.ti             | <del>Psychiatric Evaluation/</del>   |
| 9  | specificit*.ab.         | <del>Testing/</del>                  |
| 10 | cut?off*.ab.            | <del>Test Interpretation/</del>      |
| 11 | cut* score*.ab.         | <del>Rating Scales/</del>            |
| 12 | cut?point*.ab.          | prevalence.af.                       |
| 13 | threshold score*.ab.    | predict*.ti.                         |
| 14 | reference standard*.ab. | identif*.ti                          |
| 15 | reference test*.ab.     |                                      |
| 16 | index test*.ab.         |                                      |
| 17 | gold standard.ab.       |                                      |

### Diagnostic accuracy (prediction) filters:

Some diagnostic accuracy terms were adapted from the following 2 hedges, demonstrated to be the two best strategies in [Geersing GJ, Bouwmeester W, Zuithoff P, Spijker R, Leeftang M, Moons K. Search filters for finding prognostic and diagnostic prediction studies in medline to enhance systematic reviews. PLoS One; 2012;7(2):e32844 ]:

Ingui BJ, Rogers MA (2001) Searching for clinical prediction rules in MEDLINE. J Am Med Inform Assoc 8: 391–397.

Wong SS, Wilczynski NL, Haynes RB, Ramkissoonsingh R (2003) Developing optimal search strategies for detecting sound clinical prediction studies in MEDLINE. AMIA Annu Symp Proc 728–732.

**Searches conducted: <July 16, 2018>**

| Platform                                 | Databases(s)                                                                                                                                             | Results | Saved (account)       | Remarks                             |
|------------------------------------------|----------------------------------------------------------------------------------------------------------------------------------------------------------|---------|-----------------------|-------------------------------------|
| OvidSP                                   | Ovid MEDLINE(R), Ovid MEDLINE(R) In-Process & Other Non-Indexed Citations, Ovid MEDLINE(R) Daily and Ovid OLDMEDLINE(R) 1946 to Present (MEDLINE search) | 2960    | DepressionSR/ depress | Screening Accuracy— Rebuild AND GDS |
|                                          | PsycInfo                                                                                                                                                 | 5686    |                       |                                     |
| Clarivate                                | Web of Science                                                                                                                                           | 4166    |                       |                                     |
| Total database search results in EndNote |                                                                                                                                                          | 12812   |                       |                                     |
| <b>Total deduplicated in EndNote</b>     |                                                                                                                                                          |         |                       |                                     |

**De-Duplication using RefWorks: July 25<sup>th</sup>, 2018**

| Platform  | Database(s)                                                                                                                                              | Results (No. Of Citations) | After de-Duplication (No. of citations)                                                                                                                                                     | Saved (account)       | Remarks                             |
|-----------|----------------------------------------------------------------------------------------------------------------------------------------------------------|----------------------------|---------------------------------------------------------------------------------------------------------------------------------------------------------------------------------------------|-----------------------|-------------------------------------|
| OvidSP    | Ovid MEDLINE(R), Ovid MEDLINE(R) In-Process & Other Non-Indexed Citations, Ovid MEDLINE(R) Daily and Ovid OLDMEDLINE(R) 1946 to Present (MEDLINE search) | 2960                       | 2940 (Refworks shows 2972, which is not possible. Must be some error in RefWorks. 2940 was obtained by subtracting the no. of citation in psycInfo and WoS from the Total no. of citations) | DepressionSR/ depress | Screening Accuracy— Rebuild AND GDS |
|           | PsycInfo                                                                                                                                                 | 5686                       | 4648                                                                                                                                                                                        |                       |                                     |
| Clarivate | Web of Science                                                                                                                                           | 4166                       | 1876                                                                                                                                                                                        |                       |                                     |

|                                          |       |                                          |  |  |
|------------------------------------------|-------|------------------------------------------|--|--|
| Total database search results in EndNote | 12812 | 9464 (9496, if you calculate using 2972) |  |  |
|------------------------------------------|-------|------------------------------------------|--|--|

**NOTE: When the citations were uploaded onto the DEPRESSD – GDS account on Distiller SR, Distiller detected the overlap in citations between the different databases (i.e. MEDLINE, Psycinfo and WoS), which RefWorks was not able to detect (which had lead to the 2972 no. of citations in the MEDLINE folder in RefWorks and total number of citations to 9496) and skipped them. So the Total number of citation uploaded on DEPRESSD-GDS on Distiller is 9464.**

**NOTE: 30/07/2018 - De-Duplication - Before De-duplication in DistillerSR - 9464 citations. 114 additional duplicates were removed by DistillerSR, leaving 9350 unique citations.**

Web of Science

TS=(screen\* OR prevalence OR "predictive value\*" OR detect\* OR sensitiv\* OR valid\* OR revalid\* OR predict\* OR accura\* OR psychometric\* OR identif\* OR specificit\* OR cutoff\* OR "cut off\*" OR "cut\* score\*" OR cutpoint\* OR "cut point\*" OR "threshold score\*" OR "reference standard\*" OR "reference test\*" OR "index test\*" OR "gold standard" OR "reliab\*")  
AND

TS=(GDS\* OR "Geriatric Depression Scale\*")

PsycInfo

|    |                                 |       |
|----|---------------------------------|-------|
| 1  | geriatric depression scale*.mp. | 8643  |
| 2  | GDS*.mp.                        | 1741  |
| 3  | 1 or 2                          | 9118  |
| 4  | Diagnosis/                      | 38494 |
| 5  | Medical Diagnosis/              | 6672  |
| 6  | Psychodiagnosis/                | 11207 |
| 7  | Misdiagnosis/                   | 515   |
| 8  | Screening/                      | 8719  |
| 9  | Health Screening/               | 2931  |
| 10 | Screening Tests/                | 4974  |

|    |                                      |        |
|----|--------------------------------------|--------|
| 1  |                                      |        |
| 2  |                                      |        |
| 3  | 11 Prediction/                       | 14366  |
| 4  | 12 Cutting Scores/                   | 303    |
| 5  | 13 Psychometrics/                    | 51843  |
| 6  | 14 Test Validity/                    | 62121  |
| 7  | 15 screen*.af.                       | 246719 |
| 8  | 16 predictive value*.af.             | 30082  |
| 9  | 17 detect*.ti.                       | 14839  |
| 10 | 18 sensitiv*.ti.                     | 15767  |
| 11 | 19 valid*.ti.                        | 41010  |
| 12 | 20 revalid*.ti.                      | 47     |
| 13 | 21 accura*.ti.                       | 7580   |
| 14 | 22 psychometric*.ti.                 | 11717  |
| 15 | 23 specificit*.ab.                   | 30160  |
| 16 | 24 cut?off*.ab.                      | 5626   |
| 17 | 25 cut* score*.ab.                   | 2594   |
| 18 | 26 cut?point*.ab.                    | 265    |
| 19 | 27 threshold score*.ab.              | 174    |
| 20 | 28 reference standard*.ab.           | 502    |
| 21 | 29 reference test*.ab.               | 90     |
| 22 | 30 index test*.ab.                   | 73     |
| 23 | 31 gold standard.ab.                 | 4174   |
| 24 | 32 or/4-31                           | 453786 |
| 25 | 33 3 and 32                          | 5686   |
| 26 |                                      |        |
| 27 |                                      |        |
| 28 |                                      |        |
| 29 |                                      |        |
| 30 |                                      |        |
| 31 |                                      |        |
| 32 |                                      |        |
| 33 |                                      |        |
| 34 |                                      |        |
| 35 |                                      |        |
| 36 |                                      |        |
| 37 |                                      |        |
| 38 |                                      |        |
| 39 |                                      |        |
| 40 | MEDLINE                              |        |
| 41 | 1 Geriatric depression scale*.af.    |        |
| 42 | 2 GDS*.af.                           |        |
| 43 | 3 1 or 2                             |        |
| 44 | 4 Mass Screening/                    |        |
| 45 | 5 Psychiatric Status Rating Scales/  |        |
| 46 | 6 "Predictive Value of Tests"/       |        |
| 47 | 7 "Reproducibility of Results"/      |        |
| 48 | 8 exp "Sensitivity and Specificity"/ |        |
| 49 | 9 Psychometrics/                     |        |
| 50 | 10 Prevalence/                       |        |
| 51 |                                      |        |
| 52 |                                      |        |
| 53 |                                      |        |
| 54 |                                      |        |
| 55 |                                      |        |
| 56 |                                      |        |
| 57 |                                      |        |
| 58 |                                      |        |
| 59 |                                      |        |
| 60 |                                      |        |

- 1  
2  
3 11 Reference Values/  
4 12 Reference Standards/  
5 13 exp Diagnostic Errors/  
6 14 validation studies.pt.  
7 15 comparative study.pt.  
8 16 screen\*.af.  
9 17 prevalence.af.  
10 18 predictive value\*.af.  
11 19 detect\*.ti.  
12 20 sensitiv\*.ti.  
13 21 valid\*.ti.  
14 22 revalid\*.ti.  
15 23 predict\*.ti.  
16 24 accura\*.ti.  
17 25 psychometric\*.ti.  
18 26 identif\*.ti.  
19 27 specificit\*.ab.  
20 28 cut?off\*.ab.  
21 29 cut\* score\*.ab.  
22 30 cut?point\*.ab.  
23 31 threshold score\*.ab.  
24 32 reference standard\*.ab.  
25 33 reference test\*.ab.  
26 34 index test\*.ab.  
27 35 gold standard.ab.  
28 36 Mental disorders/di, pc  
29 37 Mood disorders/di, pc  
30 38 depressive disorder/di, pc  
31 39 depressive disorder, major/di, pc  
32 40 depression, postpartum/di, pc  
33 41 depression/di, pc  
34 4 or 5 or 6 or 7 or 8 or 9 or 10 or 11 or 12 or 13 or 14 or 15 or 16 or 17 or 18 or 19 or 20 or 21  
35 42 or 22 or 23 or 24 or 25 or 26 or 27 or 28 or 29 or 30 or 31 or 32 or 33 or 34 or 35 or 36 or 37  
36 or 38 or 39 or 40 or 41  
37 43 3 and 42  
38  
39  
40  
41  
42  
43  
44  
45  
46  
47  
48  
49  
50  
51  
52  
53  
54  
55  
56  
57  
58  
59  
60



## SUPPLEMENTARY FILE 2: Coding Manual

### Title/Abstract Screening

#### 1. Exclude if no original human data or it is a case study.

Exclude if it is clear from the title and abstract that the article is not an original report of primary data, but for example a letter, editorial, systematic review or meta-analysis, or if it is a case series or single case study. Studies reporting only on animal, cellular, or genetic data are also excluded. Studies that report results in conference abstracts are eligible for inclusion.

#### 2. Exclude if study did not involve administration of the GDS-30, GDS-15, GDS-5 or GDS-4.

Exclude if there is no mention in the title or abstract of any of these versions of the Geriatric Depression Scale (GDS).

#### 3. Exclude if there is no assessment of major depression.

Exclude studies if it is clear from the title and abstract that a clinical interview for depression was not conducted. Only studies that assess adults for a DSM diagnosis of current (30-day or actual presence) MDD/MDE or ICD diagnosis of a current major depressive episode will be included. Studies that include broader diagnostic categories, such as other depressive (e.g., minor depression, dysthymia) or anxiety disorders, are eligible for inclusion only if they may have separate classifications of adults with MDD or major depressive episode in the primary data. It is unlikely that studies can be excluded at the title/abstract level based on differential diagnosis (e.g., major versus major + minor depression).

#### 4. Exclude if studies do not use a validated diagnostic interview to assess major depression.

Only studies that assess adults for a DSM diagnosis of current (30-day or actual presence) MDD/MDE or ICD diagnosis of a current major depressive episode using a validated structured or semi-structured diagnostic interview will be included. Examples of validated diagnostic interviews and other assessment tools that are not validated diagnostic interviews are listed below. Studies that clearly only used a self-report questionnaire to classify patients as depressed are excluded. If studies appear to have conducted a clinical interview to diagnose depression based on the title/abstract review, but it is not clear if a validated diagnostic interview was used, they should be included for full-text review.

*Examples of validated diagnostic interviews:*

Composite International Diagnostic Interview (CIDI)

Diagnostic Interview Schedule (DIS)

1  
2  
3 Diagnostic Interview Schedule for Children (DISC)  
4 Diagnostisches Interview bei psychischen Störungen im Kindes (Kinder-DIPS)  
5 Mini-International Neuropsychiatric Interview (MINI)  
6 Schedule for Affective Disorders and Schizophrenia (SADS)  
7 Schedules for Clinical Assessment in Neuropsychiatry (SCAN)  
8 Structured Clinical Interview for DSM (SCID)  
9

10  
11 *Examples of assessment tools that are not validated diagnostic interviews:*

12 Any self-report measure completed by patients  
13 Hamilton Depression Rating Scale (HAM-D, HDRS)  
14 Montgomery Asberg Depression Rating Scale (MADRS)  
15 Primary Care Evaluation of Mental Disorders (PRIME-MD)  
16 WHO Major Depression Inventory  
17 International Diagnostic Checklist for ICD-10  
18  
19

20  
21 **5. Exclude if GDS and diagnostic interview not administered within 2 weeks of**  
22 **each other.**  
23

24 Studies are excluded if it is clear based on the title and abstract that the GDS and  
25 diagnostic interview were not administered within two weeks of one another, such as  
26 in a longitudinal study that administered one at one time point and the other at a  
27 different time point.  
28

29  
30 **6. Exclude if sample selection is based on the presence of distress or depression.**  
31

32 Studies of patients who are pre-selected as possibly distressed or depressed (e.g.,  
33 based on clinician's judgment or screening instrument cut-off) prior to administration  
34 of the study screening tool and diagnostic interview are excluded. Studies of patients  
35 receiving psychiatric treatment or with psychiatric diagnoses are excluded with the  
36 exception of studies of substance or alcohol abuse patients. Studies in which only  
37 part of the sample is selected based on distress or depression may be eligible if data  
38 for patients not selected due to distress levels can be obtained. If only patients above  
39 a cutoff score on the GDS are administered the diagnostic interview, the study is  
40 excluded. If, however, a proportion of patients both above and below the GDS cutoff  
41 are administered the interview, the study would be included.  
42  
43

44  
45 **7. Exclude if not adults.**  
46

47 Studies are excluded if it is clear from the title/abstract that the study sample does  
48 not include adults aged 18 and over. Studies with mixed population samples are  
49 eligible for inclusion if data for adults can be obtained. However, studies that assess  
50 only pediatric, adolescent, school or undergraduate samples will not be included,  
51 even if some participants are at least 18 years old.  
52  
53  
54  
55  
56  
57  
58  
59  
60

## Full Text Review

### 1. Exclude if no original human data or it is a case study.

Exclude if the article is not an original report of primary data, but for example a letter, editorial, systematic review or meta-analysis, or it is a case series or single case study. Studies reporting only on animal, cellular, or genetic data are also excluded. Studies that report results in conference abstracts are eligible for inclusion.

### 2. Exclude if study did not involve administration of the GDS-30, GDS-15, GDS-5 or GDS-4.

Exclude if patients were not administered the GDS-30, GDS-15, GDS-5 or GDS-4.

### 3. Exclude if there is no assessment of major depression.

Exclude studies if there is not a clinical interview to diagnose current (30-day or actual) MDD based on DSM or a current major depressive episode based on ICD. Studies that include broader diagnostic categories, such as other depressive (e.g., minor depression, dysthymia) or anxiety disorders, are eligible for inclusion only if they have classified adults with MDD or major depressive episode in the primary data.

*Examples of inclusion / exclusion of different depression diagnoses:*

#### **DSM-IV-TR:**

Include: Major Depression.

Exclude: Dysthymic Disorder, Minor Depression (at least two depressive symptoms are present for two weeks).

#### **ICD-10:**

Include: mild, moderate, severe, recurrent depressive episodes.

Exclude: recurrent brief depressive disorder (requires a depressive episode with symptomatic criteria, but lasting less than 2 weeks and requires that the episodes occur at least once per month for 12 consecutive months).

#### **RESEARCH DIAGNOSTIC CRITERIA (RDC):**

Include: Major Depressive Disorder.

#### **DSM-III:**

Include: Major depression.

Exclude: Dysthymic Disorder, atypical affective disorders.

### 4. Exclude if studies do not use a validated diagnostic interview to assess major depression.

Only studies that assess adults for a DSM diagnosis of current (30-day or actual

presence) MDD or ICD diagnosis of a current major depressive episode using a validated structured or semi-structured diagnostic interview will be included. Examples of validated diagnostic interviews and other assessment tools that are not validated diagnostic interviews are listed below. Studies that clearly only used a self-report questionnaire to classify patients as depressed are excluded.

*Examples of validated diagnostic interviews:*

Composite International Diagnostic Interview (CIDI)  
Diagnostic Interview Schedule (DIS)  
Diagnostic Interview Schedule for Children (DISC)  
Diagnostisches Interview bei psychischen Störungen im Kindes (Kinder-DIPS)  
Mini-International Neuropsychiatric Interview (MINI)  
Schedule for Affective Disorders and Schizophrenia (SADS)  
Schedules for Clinical Assessment in Neuropsychiatry (SCAN)  
Structured Clinical Interview for DSM (SCID)

*Examples of assessment tools that are not validated diagnostic interviews:*

Any self-report measure completed by patients  
Hamilton Depression Rating Scale (HAM-D, HDRS)  
Montgomery Asberg Depression Rating Scale (MADRS)  
Primary Care Evaluation of Mental Disorders (PRIME-MD)  
International Diagnostic Checklist for ICD-10

**5. Exclude if GDS and diagnostic interview not administered within 2 weeks of each other.**

Studies are excluded if the GDS and diagnostic interview were not administered within two weeks of one another. Datasets where some patients were administered the screening tools within 2 weeks of the diagnostic interview and some patients were not will be included if the original data allows us to select patients administered the diagnostic interview and screening tools within the two-week window.

**6. Exclude if sample selection is based on the presence of distress or depression.**

Studies of patients who are pre-selected as possibly distressed or depressed (e.g., based on clinician's judgment or screening instrument cut-off) prior to administration of the study screening tool and diagnostic interview are excluded. Studies of patients receiving psychiatric treatment or with psychiatric diagnoses are excluded with the exception of studies of substance or alcohol abuse patients. Studies in which only part of the sample is selected based on distress or depression may be eligible if data for patients not selected due to distress levels can be obtained. If only patients above a cutoff score on the GDS are administered the diagnostic interview, the study is excluded. If, however, a proportion of patients both above and below the GDS cutoff are administered the interview, the study would be included.

**7. Exclude if not adults.**

1  
2  
3  
4 Studies are excluded if the study sample does not include adults aged 18 and over.  
5 Studies with mixed population samples are eligible for inclusion if data for adults  
6 can be obtained. However, studies that assess only pediatric, adolescent, school or  
7 undergraduate samples will not be included, even if some participants are at least 18  
8 years old.  
9  
10  
11  
12  
13  
14  
15  
16  
17  
18  
19  
20  
21  
22  
23  
24  
25  
26  
27  
28  
29  
30  
31  
32  
33  
34  
35  
36  
37  
38  
39  
40  
41  
42  
43  
44  
45  
46  
47  
48  
49  
50  
51  
52  
53  
54  
55  
56  
57  
58  
59  
60

For peer review only

**SUPPLEMENTARY FILE 3: Draft Flow Diagram of Study Selection Process**

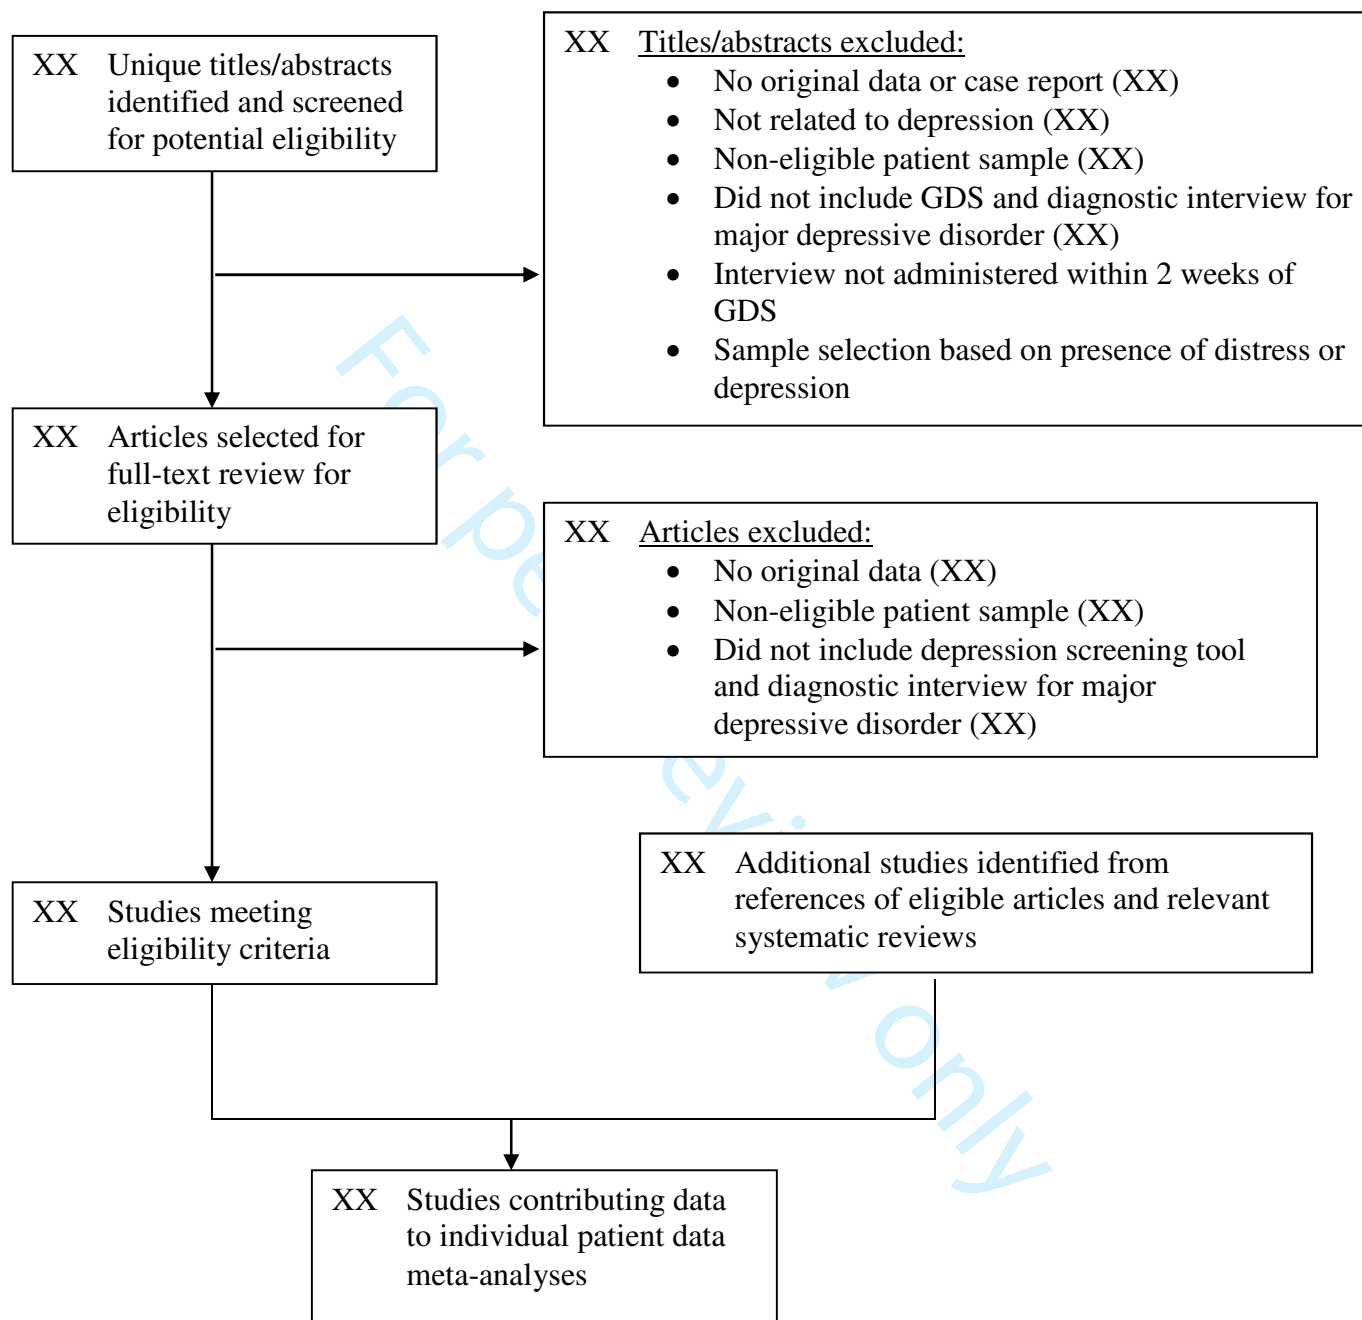

**PRISMA-P (Preferred Reporting Items for Systematic review and Meta-Analysis Protocols) 2015 checklist: recommended items to address in a systematic review protocol\***

| Section and topic                 | Item No | Page No | Checklist item                                                                                                                                                                                                                |
|-----------------------------------|---------|---------|-------------------------------------------------------------------------------------------------------------------------------------------------------------------------------------------------------------------------------|
| <b>ADMINISTRATIVE INFORMATION</b> |         |         |                                                                                                                                                                                                                               |
| Title:                            |         |         |                                                                                                                                                                                                                               |
| Identification                    | 1a      | 1       | Identify the report as a protocol of a systematic review                                                                                                                                                                      |
| Update                            | 1b      | N/A     | If the protocol is for an update of a previous systematic review, identify as such                                                                                                                                            |
| Registration                      | 2       | 4       | If registered, provide the name of the registry (such as PROSPERO) and registration number                                                                                                                                    |
| Authors:                          |         |         |                                                                                                                                                                                                                               |
| Contact                           | 3a      | 1-2     | Provide name, institutional affiliation, e-mail address of all protocol authors; provide physical mailing address of corresponding author                                                                                     |
| Contributions                     | 3b      | 16      | Describe contributions of protocol authors and identify the guarantor of the review                                                                                                                                           |
| Amendments                        | 4       | 9       | If the protocol represents an amendment of a previously completed or published protocol, identify as such and list changes; otherwise, state plan for documenting important protocol amendments                               |
| Support:                          |         |         |                                                                                                                                                                                                                               |
| Sources                           | 5a      | 16      | Indicate sources of financial or other support for the review                                                                                                                                                                 |
| Sponsor                           | 5b      | 16      | Provide name for the review funder and/or sponsor                                                                                                                                                                             |
| Role of sponsor or funder         | 5c      | 16-17   | Describe roles of funder(s), sponsor(s), and/or institution(s), if any, in developing the protocol                                                                                                                            |
| <b>INTRODUCTION</b>               |         |         |                                                                                                                                                                                                                               |
| Rationale                         | 6       | 6-8     | Describe the rationale for the review in the context of what is already known                                                                                                                                                 |
| Objectives                        | 7       | 8       | Provide an explicit statement of the question(s) the review will address with reference to participants, interventions, comparators, and outcomes (PICO)                                                                      |
| <b>METHODS</b>                    |         |         |                                                                                                                                                                                                                               |
| Eligibility criteria              | 8       | 10-11   | Specify the study characteristics (such as PICO, study design, setting, time frame) and report characteristics (such as years considered, language, publication status) to be used as criteria for eligibility for the review |
| Information sources               | 9       | 9-10    | Describe all intended information sources (such as electronic databases, contact with study authors, trial registers or other grey literature sources) with planned dates of coverage                                         |
| Search strategy                   | 10      | 24-29   | Present draft of search strategy to be used for at least one electronic database, including planned limits, such that it could be repeated                                                                                    |
| Study records:                    |         |         |                                                                                                                                                                                                                               |
| Data                              | 11a     | 11-12   | Describe the mechanism(s) that will be used to manage records and data throughout the review                                                                                                                                  |

|                                    |     |       |                                                                                                                                                                                                                                                  |  |
|------------------------------------|-----|-------|--------------------------------------------------------------------------------------------------------------------------------------------------------------------------------------------------------------------------------------------------|--|
| management                         |     |       |                                                                                                                                                                                                                                                  |  |
| Selection process                  | 11b | 10-11 | State the process that will be used for selecting studies (such as two independent reviewers) through each phase of the review (that is, screening, eligibility and inclusion in meta-analysis)                                                  |  |
| Data collection process            | 11c | 11-12 | Describe planned method of extracting data from reports (such as piloting forms, done independently, in duplicate), any processes for obtaining and confirming data from investigators                                                           |  |
| Data items                         | 12  | 13-14 | List and define all variables for which data will be sought (such as PICO items, funding sources), any pre-planned data assumptions and simplifications                                                                                          |  |
| Outcomes and prioritization        | 13  | 12-15 | List and define all outcomes for which data will be sought, including prioritization of main and additional outcomes, with rationale                                                                                                             |  |
| Risk of bias in individual studies | 14  | 12    | Describe anticipated methods for assessing risk of bias of individual studies, including whether this will be done at the outcome or study level, or both; state how this information will be used in data synthesis                             |  |
| Data synthesis                     | 15a | 11-12 | Describe criteria under which study data will be quantitatively synthesised                                                                                                                                                                      |  |
|                                    | 15b | 12-15 | If data are appropriate for quantitative synthesis, describe planned summary measures, methods of handling data and methods of combining data from studies, including any planned exploration of consistency (such as $I^2$ , Kendall's $\tau$ ) |  |
|                                    | 15c | 12-14 | Describe any proposed additional analyses (such as sensitivity or subgroup analyses, meta-regression)                                                                                                                                            |  |
|                                    | 15d | N/A   | If quantitative synthesis is not appropriate, describe the type of summary planned                                                                                                                                                               |  |
| Meta-bias(es)                      | 16  | N/A   | Specify any planned assessment of meta-bias(es) (such as publication bias across studies, selective reporting within studies)                                                                                                                    |  |
| Confidence in cumulative evidence  | 17  | N/A   | Describe how the strength of the body of evidence will be assessed (such as GRADE)                                                                                                                                                               |  |

**\* It is strongly recommended that this checklist be read in conjunction with the PRISMA-P Explanation and Elaboration (cite when available) for important clarification on the items. Amendments to a review protocol should be tracked and dated. The copyright for PRISMA-P (including checklist) is held by the PRISMA-P Group and is distributed under a Creative Commons Attribution Licence 4.0.**

*From: Shamseer L, Moher D, Clarke M, Ghersi D, Liberati A, Petticrew M, Shekelle P, Stewart L, PRISMA-P Group. Preferred reporting items for systematic review and meta-analysis protocols (PRISMA-P) 2015: elaboration and explanation. BMJ. 2015 Jan 2;349(jan02 1):g7647.*



# BMJ Open

## Diagnostic Accuracy of the Geriatric Depression Scale-30, Geriatric Depression Scale-15, Geriatric Depression Scale-5, and Geriatric Depression Scale-4 for Detecting Major Depression: Protocol for a Systematic Review and Individual Participant Data Meta-Analysis

|                                 |                                                                                                                                                                                                                                                                                                                                                                                                                                                                                                                                                                                                                                                                                                                                                                                                                                                                                                                                                                                                                                                                                                                                                                                                                                                                                                                                                                                                                                                                                                                                                                                                                                                                                                                                                                                                                                                                                                                                                                                         |
|---------------------------------|-----------------------------------------------------------------------------------------------------------------------------------------------------------------------------------------------------------------------------------------------------------------------------------------------------------------------------------------------------------------------------------------------------------------------------------------------------------------------------------------------------------------------------------------------------------------------------------------------------------------------------------------------------------------------------------------------------------------------------------------------------------------------------------------------------------------------------------------------------------------------------------------------------------------------------------------------------------------------------------------------------------------------------------------------------------------------------------------------------------------------------------------------------------------------------------------------------------------------------------------------------------------------------------------------------------------------------------------------------------------------------------------------------------------------------------------------------------------------------------------------------------------------------------------------------------------------------------------------------------------------------------------------------------------------------------------------------------------------------------------------------------------------------------------------------------------------------------------------------------------------------------------------------------------------------------------------------------------------------------------|
| Journal:                        | <i>BMJ Open</i>                                                                                                                                                                                                                                                                                                                                                                                                                                                                                                                                                                                                                                                                                                                                                                                                                                                                                                                                                                                                                                                                                                                                                                                                                                                                                                                                                                                                                                                                                                                                                                                                                                                                                                                                                                                                                                                                                                                                                                         |
| Manuscript ID                   | bmjopen-2018-026598.R1                                                                                                                                                                                                                                                                                                                                                                                                                                                                                                                                                                                                                                                                                                                                                                                                                                                                                                                                                                                                                                                                                                                                                                                                                                                                                                                                                                                                                                                                                                                                                                                                                                                                                                                                                                                                                                                                                                                                                                  |
| Article Type:                   | Protocol                                                                                                                                                                                                                                                                                                                                                                                                                                                                                                                                                                                                                                                                                                                                                                                                                                                                                                                                                                                                                                                                                                                                                                                                                                                                                                                                                                                                                                                                                                                                                                                                                                                                                                                                                                                                                                                                                                                                                                                |
| Date Submitted by the Author:   | 08-Oct-2018                                                                                                                                                                                                                                                                                                                                                                                                                                                                                                                                                                                                                                                                                                                                                                                                                                                                                                                                                                                                                                                                                                                                                                                                                                                                                                                                                                                                                                                                                                                                                                                                                                                                                                                                                                                                                                                                                                                                                                             |
| Complete List of Authors:       | <p>Benedetti, Andrea; McGill University, Departments of Medicine and of Epidemiology, Biostatistics &amp; Occupational Health; McGill University Health Centre, Respiratory Epidemiology and Clinical Research Unit</p> <p>Wu, Yin; McGill University, Departments of Psychiatry and of Epidemiology, Biostatistics &amp; Occupational Health; Jewish General Hospital, Lady Davis Institute for Medical Research</p> <p>Levis, Brooke; McGill University, Department of Epidemiology, Biostatistics &amp; Occupational Health; Jewish General Hospital, Lady Davis Institute for Medical Research</p> <p>Wilchesky, Machel ; McGill University, Departments of Medicine and of Family Medicine; Jewish General Hospital, Lady Davis Institute for Medical Research</p> <p>Boruff, Jill; McGill University, Schulich Library of Science and Engineering</p> <p>Ioannidis, John; Stanford University, USA, Stanford Prevention Research Center, Departments of Medicine and of Health Research &amp; Policy</p> <p>Patten, Scott ; University of Calgary, Departments of Community Health Sciences and of Psychiatry</p> <p>Cuijpers, Pim; VU University Amsterdam, Department of Clinical, Neuro and Developmental Psychology and Amsterdam Public Health research institute</p> <p>Shrier, Ian; McGill University, Department of Epidemiology, Biostatistics &amp; Occupational Health; Jewish General Hospital, Lady Davis Institute for Medical Research</p> <p>Gilbody, Simon; The University of York, Department of Health Sciences</p> <p>Ismail, Zahinoor; University of Calgary, Departments of Community Health Sciences, of Psychiatry and of Clinical Neurosciences</p> <p>McMillan, Dean; University of York, Department of Health Sciences</p> <p>Mitchell, Nicholas; University of Alberta, Department of Psychiatry</p> <p>Ziegelstein, Roy; Johns Hopkins University School of Medicine, Department of Medicine</p> <p>Thombs, Brett; McGill University, Psychiatry</p> |
| <b>Primary Subject Heading</b>: | Mental health                                                                                                                                                                                                                                                                                                                                                                                                                                                                                                                                                                                                                                                                                                                                                                                                                                                                                                                                                                                                                                                                                                                                                                                                                                                                                                                                                                                                                                                                                                                                                                                                                                                                                                                                                                                                                                                                                                                                                                           |
| Secondary Subject Heading:      | Diagnostics, Mental health                                                                                                                                                                                                                                                                                                                                                                                                                                                                                                                                                                                                                                                                                                                                                                                                                                                                                                                                                                                                                                                                                                                                                                                                                                                                                                                                                                                                                                                                                                                                                                                                                                                                                                                                                                                                                                                                                                                                                              |
| Keywords:                       | depression, Geriatric Depression Scale, GDS, diagnostic test accuracy,                                                                                                                                                                                                                                                                                                                                                                                                                                                                                                                                                                                                                                                                                                                                                                                                                                                                                                                                                                                                                                                                                                                                                                                                                                                                                                                                                                                                                                                                                                                                                                                                                                                                                                                                                                                                                                                                                                                  |

1  
2  
3  
4  
5  
6  
7  
8  
9  
10  
11  
12  
13  
14  
15  
16  
17  
18  
19  
20  
21  
22  
23  
24  
25  
26  
27  
28  
29  
30  
31  
32  
33  
34  
35  
36  
37  
38  
39  
40  
41  
42  
43  
44  
45  
46  
47  
48  
49  
50  
51  
52  
53  
54  
55  
56  
57  
58  
59  
60

|  |                                           |
|--|-------------------------------------------|
|  | individual participant data meta-analysis |
|  |                                           |

SCHOLARONE™  
Manuscripts

For peer review only

1  
2  
3 **Diagnostic Accuracy of the Geriatric Depression Scale-30, Geriatric Depression Scale-15,**  
4 **Geriatric Depression Scale-5, and Geriatric Depression Scale-4 for Detecting Major**  
5 **Depression: Protocol for a Systematic Review and Individual Participant Data Meta-**  
6 **Analysis**  
7  
8  
9  
10  
11  
12  
13  
14

15 Andrea Benedetti, PhD<sup>1-3</sup>; Yin Wu, PhD<sup>2,4,5</sup>; Brooke Levis, MSc<sup>2,5</sup>; Machelles Wilchesky,  
16 PhD<sup>3,5,6</sup>; Jill Boruff, MLIS<sup>7</sup>; John P. A. Ioannidis, MD, DSc<sup>8,9</sup>; Scott B. Patten, MD, PhD<sup>10,11</sup>;  
17 Pim Cuijpers, PhD<sup>12</sup>; Ian Shrier, MD, PhD<sup>2,5</sup>; Simon Gilbody, DPhil, FRCPsych<sup>13</sup>; Zahinoor  
18 Ismail, MD FRCPC<sup>10,11,14</sup>; Dean McMillan, PhD<sup>13</sup>; Nicholas Mitchell, MD, MSc<sup>15</sup>; Roy C.  
19 Ziegelstein, MD<sup>16</sup>; Brett D. Thombs, PhD<sup>2-5,17,18</sup>  
20  
21  
22  
23  
24  
25  
26  
27

28 <sup>1</sup>Respiratory Epidemiology and Clinical Research Unit, McGill University Health Centre,  
29 Montreal, Quebec, Canada; Departments of <sup>2</sup>Epidemiology, Biostatistics and Occupational  
30 Health; <sup>3</sup>Medicine; and <sup>4</sup>Psychiatry; McGill University, Montreal, Quebec, Canada; <sup>5</sup>Lady Davis  
31 Institute for Medical Research, Jewish General Hospital, Montreal, Quebec, Canada;  
32  
33 <sup>6</sup>Department of Family Medicine, McGill University, Montreal, Quebec, Canada; <sup>7</sup>Schulich  
34 Library of Physical Sciences, Life Sciences, and Engineering, McGill University, Montreal,  
35 Quebec, Canada; <sup>8</sup>Stanford Prevention Research Center, Department of Medicine, and  
36 Department of Health Research and Policy, Stanford School of Medicine; Stanford, California,  
37 USA; <sup>9</sup>Department of Statistics, Stanford University School of Humanities and Sciences,  
38 Stanford, California, USA; Departments of <sup>10</sup>Community Health Sciences and <sup>11</sup>Psychiatry,  
39 University of Calgary, Calgary, Canada; <sup>12</sup>Department of Clinical, Neuro and Developmental  
40 Psychology and Amsterdam Public Health research institute, Vrije Universiteit Amsterdam, The  
41  
42  
43  
44  
45  
46  
47  
48  
49  
50  
51  
52  
53  
54  
55  
56  
57  
58  
59  
60

1  
2  
3 Netherlands; <sup>13</sup>Hull York Medical School and Department of Health Sciences, University of  
4 York, York, UK; <sup>14</sup>Department of Clinical Neurosciences, University of Calgary, Calgary,  
5  
6  
7 Edmonton, Canada; <sup>15</sup>Department of Psychiatry, University of Alberta, Edmonton, Canada;  
8  
9  
10 <sup>16</sup>Department of Medicine, Johns Hopkins University School of Medicine, Baltimore, Maryland,  
11  
12 USA; Departments of <sup>17</sup>Psychology and <sup>18</sup>Educational and Counselling Psychology; McGill  
13  
14 University, Montreal, Quebec, Canada.  
15  
16  
17  
18

19 **Addresses for Correspondence:**

20  
21 Andrea Benedetti, PhD; 5252 de Maisonneuve Blvd. West; Montreal, Quebec, Canada H4A 3S5;  
22  
23  
24 Tel (514) 934-1934 ext. 32161; E-mail: andrea.benedetti@mcgill.ca  
25  
26  
27

28  
29 Brett D. Thombs, PhD; 4333 Cote Ste Catherine Road; Montreal, Quebec, Canada H3T 1E4; Tel  
30  
31 (514) 340-8222 ext. 25112; E-mail: brett.thombs@mcgill.ca.  
32  
33  
34

35 **Key Words:** depression; Geriatric Depression Scale; GDS; diagnostic test accuracy; individual  
36  
37 participant data meta-analysis.  
38  
39  
40  
41

42 **Word Count:** 3,018  
43  
44  
45  
46  
47  
48  
49  
50  
51  
52  
53  
54  
55  
56  
57  
58  
59  
60

## ABSTRACT

**Introduction:** The thirty-item Geriatric Depression Scale (GDS-30) and the shorter GDS-15, GDS-5 and GDS-4 are recommended as depression screening tools for elderly individuals. Existing meta-analyses on the diagnostic accuracy of the GDS have not been able to conduct subgroup analyses, have included patients already identified as depressed who would not be screened in practice, and have not accounted for possible bias due to selective reporting of results from only better-performing cutoffs in primary studies. Individual participant data meta-analysis (IPDMA), which involves a standard systematic review, then a synthesis of individual participant data, rather than summary results, could address these limitations. The objective of our IPDMA is to generate accuracy estimates to detect major depression for all possible cutoffs of each version of the GDS among studies using different reference standards, separately, and among participant subgroups based on age, sex, dementia diagnosis, and care settings. In addition, we will use a modelling approach to generate individual participant probabilities for major depression based on GDS scores (rather than a dichotomous cutoff) and participant characteristics (e.g., sex, age, dementia status, care setting).

**Methods and Analysis:** Individual participant data comparing GDS scores to a major depression diagnosis based on a validated structured or semi-structured diagnostic interview will be sought via a systematic review. Data sources will include Medline, Medline In-Process & Other Non-Indexed Citations, PsycINFO, and Web of Science. Bivariate random-effects models will be used to estimate diagnostic accuracy parameters for each cutoff of the different versions of the GDS. Pre-specified subgroup analyses will be conducted. Risk of bias will be assessed with the Quality Assessment of Diagnostic Accuracy Studies-2 tool.

1  
2  
3  
4  
5  
6  
7  
8  
9  
10  
11  
12  
13  
14  
15  
16  
17  
18  
19  
20  
21  
22  
23  
24  
25  
26  
27  
28  
29  
30  
31  
32  
33  
34  
35  
36  
37  
38  
39  
40  
41  
42  
43  
44  
45  
46  
47  
48  
49  
50  
51  
52  
53  
54  
55  
56  
57  
58  
59  
60

**Ethics and Dissemination:** The findings of this study will be of interest to stakeholders involved in research, clinical practice and policy.

**Systematic Review Registration:** PROSPERO (CRD42018104329)

For peer review only

## STRENGTHS AND LIMITATIONS OF THIS STUDY

- This study will use individual participant data to estimate diagnostic accuracy for all relevant cutoff scores of the different versions of the Geriatric Depression Scale (GDS). Using data from all participants at each cutoff score will overcome limitations related to selective cutoff reporting in primary study publications.
- This study will conduct analyses that exclude patients with current diagnoses of depression or who are undergoing mental health treatment, including antidepressants, at the time of study enrolment, as these patients would not be screened in clinical practice. This will overcome potential bias in primary diagnostic test accuracy studies where these patients are often included.
- This study will include subgroup analyses of diagnostic accuracy across different reference standards and by participant characteristics (e.g., sex, age, dementia status, care setting).
- A potential limitation is that the success of the study depends on the ability to obtain the relevant individual participant data and to avoid selective availability of studies with better or worse accuracy results. We do not know the proportion of eligible datasets that will be possible to include in the study.

## BACKGROUND

Major depression is present in 5-10% of the geriatric population internationally.[1,2] Effective treatments for depression are available, but identification is often haphazard. Physicians may fail to recognize up to half of all patients with depression, and most patients with depression do not receive minimally adequate care.[3-4] At the same time, there is a high rate of overdiagnosis and overtreatment, and the majority of patients who are treated do not meet diagnostic criteria.[5-7] Diagnosis of elderly individuals can be particularly difficult for clinicians due to factors such as cognitive impairments, social stigma, medical comorbidity, and atypical or vague clinical presentation.[1,8,9]

Some Canadian and international geriatric care organizations recommend screening elderly adults for depression,[10-13] but the Canadian Task Force for Preventive Health Care (CTFPHC), for instance, does not recommend depression screening, including for geriatric individuals.[14] The CTFPHC has expressed concern that published studies may overstate the accuracy of depression screening tools and that screening could lead to high rates of false positive tests, and still not improve depression outcomes.[14]

The thirty-item Geriatric Depression Scale (GDS-30), and the GDS-15, GDS-5 and GDS-4, which are fifteen-item, five-item and four-item subsets of the GDS-30, are commonly recommended as depression screening tools for elderly individuals.[15-17] As with other depression screening tools, primary studies on the diagnostic accuracy of the different versions of the GDS have been limited by (1) small samples; (2) the selective reporting of results for cutoffs when they perform well in a given sample, but not when they perform poorly; (3) the inclusion of patients already known by clinicians to have depression; and (4) the inability to conduct subgroup analyses (e.g., different age groups, dementia diagnosis, care settings) due to



1  
2  
3 small sample sizes. Conventional meta-analyses of the GDS or short versions of the GDS that  
4 have synthesized published summary data have not been able to conduct subgroup analyses or  
5  
6 exclude already-diagnosed patients,[15,16,18] and concerns have been raised about bias in these  
7  
8 meta-analyses due to selective cutoff reporting in primary studies that could not be addressed.[18]  
9

10  
11  
12 Individual participant data meta-analysis (IPDMA), which involves a standard systematic  
13  
14 review, followed by synthesis of actual participant data from primary studies, rather than  
15  
16 aggregating summary data, can address these problems by including actual participant data from  
17  
18 all studies.[19,20] In the context of evaluating the diagnostic accuracy of depression screening  
19  
20 tools, IPDMA has three major advantages compared to conventional meta-analyses. First, for the  
21  
22 conventional binary screening approach, IPDMA can address bias from the selective publication  
23  
24 of diagnostic accuracy results for well-performing cutoffs from small studies since accuracy can  
25  
26 be evaluated across all relevant cutoffs for all participants. Second, IPDMA allows the  
27  
28 appropriate exclusion of already-diagnosed or already-treated patients when primary studies have  
29  
30 data on existing diagnoses and treatment. Third, an IPDMA with large numbers of participants  
31  
32 and major depression cases would allow subgroup analyses by study-level factors (e.g., study  
33  
34 setting, risk of bias factors) and individual factors that may influence screening accuracy (e.g.,  
35  
36 age, sex, dementia diagnosis). Finally, a large IPD database would allow the development of a  
37  
38 predictive algorithm to generate estimates of the probability of having major depression based on  
39  
40 participant characteristics and actual GDS scores, rather than binary classifications of individuals  
41  
42 as simply negative or positive based on screening results. This is important because, for instance,  
43  
44 an individual with a score of 0 on the GDS-30, may have a lower likelihood of having depression  
45  
46 than an individual with a substantially higher, but sub-cutoff, score of 10. Using a dichotomous  
47  
48  
49  
50  
51  
52  
53  
54  
55  
56  
57  
58  
59  
60

1  
2  
3 cutoff method, however, both would be classified as negative screens and assigned the same  
4 probability of having depression.  
5  
6

7  
8 One of the downsides of IPDMAs is that they are resource intensive. In addition, if the  
9 primary datasets obtained are not representative of all primary studies, the IPDMA could be  
10 biased.[19-22] In a previous IPDMA of the Patient Health Questionnaire-9 (PHQ-9) screening  
11 tool, which was the first IPDMA of the diagnostic accuracy of a depression screening tool,[23]  
12 we were able to synthesize 58 of 72 eligible primary datasets (17,357 participants, 2,312 major  
13 depression cases). This suggests that investigators are generally able and willing to provide  
14 primary data from studies of the diagnostic accuracy of depression screening tools for use in  
15 IPDMA. A preliminary PubMed search for the GDS verified the existence of enough primary  
16 studies (more than 100 potentially eligible datasets that appear to have at least 30,000  
17 participants, 4,000 cases) to make IPDMA feasible for the GDS.  
18  
19  
20  
21  
22  
23  
24  
25  
26  
27  
28  
29

30  
31 Thus, the objectives of this IPDMA are to evaluate the diagnostic accuracy of the GDS-30,  
32 GDS-15, GDS-5 and GDS-4 among studies using different reference standards, separately;  
33 among participant subgroups based on age, sex, dementia diagnosis, and care settings; and  
34 excluding participants identified as already-diagnosed or treated for depression. Furthermore, a  
35 prediction model will be generated.  
36  
37  
38  
39  
40  
41

## 42 **METHODS AND ANALYSIS**

43  
44 This systematic review has been funded by the Canadian Institutes of Health Research  
45 (Funding Reference Number PJT-156365). The protocol has been registered in the PROSPERO  
46 prospective register of systematic reviews (CRD42018104329), and any changes to the study  
47 protocol will be registered as amendments with PROSPERO.  
48  
49  
50  
51  
52  
53  
54  
55  
56  
57  
58  
59  
60

1  
2  
3 The IPDMA has been designed and will be conducted in accordance with best-practice  
4 standards as elaborated in the Cochrane Handbook for Systematic Reviews of Diagnostic Test  
5 Accuracy[24] and other key sources.[19,20,25] Results will be reported in accordance with the  
6 Preferred Reporting Items for Systematic Reviews and Meta-Analyses of Diagnostic Test  
7 Accuracy Studies (PRISMA-DTA) statement and the PRISMA-IPD statement.[26,27] The  
8 IPDMA protocol does not deviate substantively from previous IPDMA protocols that we have  
9 developed and published for other depression screening tools.[23,28,29]

### 19 Sources of Evidence

21 The search strategy was developed by a medical librarian and was adapted from a search  
22 strategy developed for a similar systematic review to obtain datasets for IPDMA of the PHQ-9  
23 depression screening tool,[23] which was peer-reviewed using the Peer Review of the Electronic  
24 Search Strategy (PRESS) standard.[30] The search strategy is also similar to strategies that we  
25 have used for systematic reviews and IPDMA of the Hospital Anxiety and Depression Scale and  
26 Edinburgh Postnatal Depression Scale.[28,29]

31 We will search Medline, Medline In-Process & Other Non-Indexed Citations, PsycINFO  
32 (OvidSP platform), and Web of Science (Web of Knowledge platform). The Medline search  
33 strategy for the GDS was validated by testing against already-identified publications from our  
34 preliminary search. The strategy was then adapted for PsycINFO and Web of Science. We  
35 limited our search strategy to these databases based on research showing that adding other  
36 databases (e.g., EMBASE) when the Medline search is highly sensitive does not identify  
37 additional eligible studies.[31] The Cochrane Handbook for Systematic Reviews of Diagnostic  
38 Test Accuracy[24] suggests combining concepts of the index test and the target conditions, but  
39 this was redundant for depression screening tools as these tests are limited to testing for  
40  
41  
42  
43  
44  
45  
46  
47  
48  
49  
50  
51  
52  
53  
54  
55  
56  
57  
58  
59  
60

1  
2  
3 depression. Thus, the search strategy for electronic databases was comprised of two concepts: the  
4 index test of interest and studies of screening accuracy. There are no published search hedges  
5  
6 designed specifically for mental health screening, but key articles were consulted in developing  
7  
8 search terms.[32-34] See Supplementary File 1 for detailed information on searches. To  
9  
10 supplement electronic searches, we will search reference lists of included publications and  
11  
12 relevant reviews, conduct a related articles search using the PubMed “related articles” feature,  
13  
14 and query authors of included studies for unpublished studies. Search results will be uploaded  
15  
16 into the citation management database RefWorks (RefWorks-COS, Bethesda, MD, USA), and  
17  
18 the RefWorks duplicate check function will be used to identify citations retrieved from multiple  
19  
20 sources. Unique citations will then be uploaded into the systematic review program DistillerSR  
21  
22 (Evidence Partners, Ottawa, Canada), and DistillerSR will be used to store and track search  
23  
24 results and to track results of the review process.  
25  
26  
27  
28  
29

### 30 31 **Selection of Eligible Studies**

32  
33 To conduct the meta-analysis, we will seek primary datasets that allow us to compare  
34  
35 GDS scores to major depression diagnostic status. Datasets from articles in any language will be  
36  
37 sought for inclusion if they compare results from any version of the GDS to diagnoses of major  
38  
39 depressive disorder (MDD) or major depressive episode (MDE) made with a validated diagnostic  
40  
41 interview, administered within 2 weeks of the GDS and based on Diagnostic and Statistical  
42  
43 Manual (DSM) or International Classification of Diseases criteria (ICD), which are similar to  
44  
45 DSM criteria and generally used outside of North America.  
46  
47  
48

49 The two-week criterion was set because that is the duration of symptoms required for a  
50  
51 diagnosis of major depression. Datasets where some participants were administered the screening  
52  
53 tool within 2 weeks of the diagnostic interview and some participants were not will be included  
54  
55  
56  
57  
58  
59  
60

1  
2  
3 if the original data allows us to identify and select eligible participants. Most primary studies use  
4  
5 MDD as the reference standard, but some may use MDE, which is identical with respect to the  
6  
7 symptoms of depression, but does not exclude participants with psychotic disorders or a history  
8  
9 of manic episodes. If both are available, we will record both and prioritize DSM over ICD and  
10  
11 MDE over MDD in analyses. Data from studies where all participants are known to have  
12  
13 psychiatric diagnoses, have been referred for mental health evaluation, or are undergoing  
14  
15 treatment for depression will be excluded, with the exception of participants treated for substance  
16  
17 use disorders, for whom depression screening may be considered. The coding manual for  
18  
19 inclusion and exclusion decisions is shown in Supplementary File 2.  
20  
21  
22  
23

24 Two investigators will review articles independently for eligibility. If either reviewer  
25  
26 determines that a study may be eligible based on title or abstract review, a full-text article review  
27  
28 will be completed. Disagreement between reviewers after full-text review will be resolved by  
29  
30 consensus, including a third investigator as necessary. Translators will be used to evaluate  
31  
32 titles/abstracts and articles for languages other than those for which team members are fluent.  
33  
34 See Supplementary File 3 for a preliminary PRISMA flow of studies figure.  
35  
36  
37

### 38 **Transfer of Data and Data Management**

39  
40 Authors of studies containing datasets that meet inclusion criteria will be contacted to  
41  
42 invite them to contribute primary data for inclusion. Data will only be used from studies that  
43  
44 received ethics approval and all data that are transferred will be properly de-identified prior to  
45  
46 transfer. Participant data will be cleaned and coded for uniformity across datasets using an  
47  
48 already developed codebook, similar to codebooks used in our previous IPDMAs.[23,28,29]  
49  
50 Actual data coding and transfer from original studies into the IPD database will be done by a  
51  
52 supervised staff or trainee member of the team. Participant characteristics and screening  
53  
54  
55  
56  
57  
58  
59  
60

1  
2  
3 accuracy results for each study using the cleaned datasets will be compared to those from the  
4  
5 original datasets to identify any potential discrepancies.  
6

7  
8 In addition to obtaining original participant-level data, data will also be extracted from  
9  
10 the published articles of included studies. We will crosscheck the published data with the  
11  
12 original participant-level data obtained from each dataset and any inconsistencies will be  
13  
14 discussed with the original authors. Corrections will be made as necessary.  
15

### 16 17 **Quality Assessment**

18  
19 Two reviewers will independently use the Quality Assessment of Diagnostic Accuracy  
20  
21 Studies-2 (QUADAS-2) tool[35] to assess risk of bias in primary studies. QUADAS-2  
22  
23 incorporates assessments of risk of bias across four core domains: participant selection, the index  
24  
25 test, the reference standard, and the flow and timing of assessments. Two reviewers will  
26  
27 independently assess risk of bias, and any discrepancies will be resolved by consensus.  
28  
29

### 30 31 **Data Analysis**

32  
33 Analyses will estimate sensitivity and specificity separately at each cutoff by bivariate  
34  
35 random-effects meta-analysis models as described in Riley et al.[36] For each GDS version, we  
36  
37 will fit these models, estimated via Gaussian Hermite adaptive quadrature, for the full range of  
38  
39 plausible GDS cutoff values.[36] This approach models sensitivity and specificity  
40  
41 simultaneously and accounts for the precision of estimates within studies.[36] Data from all  
42  
43 included primary studies will be analyzed simultaneously with a random-effects model as  
44  
45 sensitivity and specificity are assumed to vary across primary studies. We will also construct a  
46  
47 pooled ROC curve and identify the optimal cutoff.[36] We will compare results that only include  
48  
49 datasets that allow the exclusion of patients diagnosed with depression or receiving depression  
50  
51 treatment (including antidepressants with reason unspecified) with results that also include  
52  
53  
54  
55  
56  
57  
58  
59  
60

1  
2  
3 studies where these data are not available. For assessment of each version, we will include  
4  
5 studies that report total scores for the specific GDS version or individual GDS item scores from  
6  
7 longer versions of the GDS which could be used to calculate total scores for the shorter version.  
8  
9 We will consider imputation if a large part of data is missing.  
10  
11

12 In a previous IPDMA with the PHQ-9,[37] we found that reference standards appeared to  
13  
14 perform differently. The Mini International Neuropsychiatric Interview (MINI) is fully  
15  
16 structured, but was designed for very rapid administration and described as its authors as being  
17  
18 over-inclusive as a result. We found that, controlling for depressive symptom scores, the MINI  
19  
20 classified approximately twice as many participants with major depression as other fully  
21  
22 structured interviews.[38,39] Compared to semi-structured interviews, which are intended to be  
23  
24 done by experienced diagnosticians and involve some clinical judgment (e.g., Structured Clinical  
25  
26 Interview for DSM Disorders) fully structured interviews (MINI excluded), diagnosed more  
27  
28 participants with low symptom levels as depressed and fewer participants with higher symptom  
29  
30 levels. Fully structured interviews can be delivered by lay interviewers and are intended to  
31  
32 achieve a high level of standardization, but may sacrifice accuracy.[40-43] Thus, we will assess  
33  
34 possible differences and evaluate sensitivity and specificity separately by reference standard.  
35  
36  
37  
38  
39

40 In secondary analyses, to the extent that there are sufficient data, we will investigate  
41  
42 subgroups according to age, sex, dementia status and severity, dementia subtype, number of  
43  
44 medical comorbidities (with specific comorbidities integrated to the extent possible), care setting  
45  
46 and risk of bias. QUADAS-2 factors that will be considered include patient selection factors,  
47  
48 blinding of reference standard to index test results, and timing between administration of index  
49  
50 test and reference standard (e.g., 0 to 7 days, 7 to 14 days). Additionally, a subgroup analysis  
51  
52  
53  
54  
55  
56  
57  
58  
59  
60

1  
2  
3 will be conducted that includes only data from countries listed as “very high development” on  
4 the United Nation’s Human Development Index.[44]  
5  
6

7  
8 If there is a sufficient number of studies with published diagnostic accuracy data for major  
9 depression that are eligible but do not provide data, studies included in the IPDMA will be  
10 compared to eligible studies that do not provide data in terms of sensitivity and specificity, using  
11 published summary data from the studies that do not provide data. Depending on the number of  
12 missing studies, a sensitivity analysis may also be conducted that includes aggregate summary  
13 estimates of sensitivity and specificity from the studies that do not provide individual participant  
14 data in the main meta-analysis, along with data from studies that contribute to the IPDMA.[36] If  
15 there are a large number of studies that do not contribute primary data, this analysis may become  
16 the primary analysis.  
17  
18  
19  
20  
21  
22  
23  
24  
25  
26  
27

28  
29 Clinical predictive models have not been used previously to generate individualized  
30 probabilities that an individual has major depression based on screening tool scores and  
31 participant characteristics. There is a rich tradition of using predictive models for risk scores or  
32 classifying patients based on diagnostic tests, and our approach will build upon those  
33 traditions.[45-50] To do this, we will develop binary predictive models that use GDS scores as  
34 well as key participant characteristics (e.g., sex, age, dementia status, care setting) to estimate the  
35 probability and associated 95% CI that an individual has major depression. We will estimate  
36 logistic mixed models and then integrate over the distribution of the random effects as described  
37 in Pavlou et al. and Skrandal et al.[51,52] Continuous variables (GDS score and age) will be  
38 modeled using flexible semi-parametric methods (e.g., regression splines). We will consider the  
39 inclusion of interaction terms. The models will be evaluated in terms of their overall  
40 performance (Nagelkerke’s  $R^2$ , Brier score), calibration (e.g., slope of linear predictor; are  
41  
42  
43  
44  
45  
46  
47  
48  
49  
50  
51  
52  
53  
54  
55  
56  
57  
58  
59  
60



1  
2  
3 average, low and high predictions correct) and discrimination (e.g., c-statistic; discrimination  
4 slope: can we separate subjects with and without major depression).[45,46] Validation with the  
5 same subjects used to develop a model results in overly optimistic performance. We will assess  
6 internal validation via the bootstrap method, which has been shown to be preferable to split  
7 sample validation approaches.[47] Although there are advantages to external validation, given  
8 the wide range of study populations that we will be using, it would be unlikely that there would  
9 be another comparable data set large enough for validation. Thus, assessment of internal validity  
10 via bootstrapping will allow us to understand how our model may perform in a clinical setting,  
11 and by adjusting our regression coefficients for optimism, the performance of our model will be  
12 as accurate as possible. In sensitivity analyses, we will explore including each item from the  
13 GDS questionnaires as a separate predictor variable, rather than only the total score.  
14  
15  
16  
17  
18  
19  
20  
21  
22  
23  
24  
25  
26  
27

### 28 **Patient and Public Involvement**

29  
30 Patients and members of the public were not involved in the study.  
31  
32

### 33 **ETHICS AND DISSEMINATION**

34  
35 This IPDMA does not require ethics approval, although only individual studies that  
36 obtained ethical clearance and informed consent will be included. The reason that the IPDMA  
37 does not require ethics review is that the objectives of the IPDMA are consistent with the  
38 objectives of the primary studies, which already received ethics approval, and only anonymized  
39 data will be provided by the investigators of the original studies.  
40  
41  
42  
43  
44  
45  
46

47 The main outcomes of the IPDMA reflect knowledge that will influence future research,  
48 clinical practice, and policy. Strategies for effective dissemination and specific outputs will be  
49 based on research showing how to best tailor research outputs to different user groups,[53-58]  
50 including research on improving the usefulness of reports of systematic review and meta-  
51  
52  
53  
54  
55  
56  
57  
58  
59  
60

1  
2  
3 analyses for health care managers and policy makers.[56,58] Dissemination will include  
4  
5 publication of results in high-impact medical journals with open access, as well as presentations  
6  
7 in seminars and symposia to policy-makers, health care providers, and researchers at national  
8  
9 and international conferences.  
10

11  
12 If the predictive model performs well, a free and easy-to use online calculation tool will be  
13  
14 created to incorporate individual characteristics into accuracy estimates and provide users of our  
15  
16 research with probabilities that individual patients have depression based on their GDS score and  
17  
18 key characteristics. The calculator will be similar to other successful tools, such as the FRAX®  
19  
20 Fracture Risk Assessment Tool (<http://www.shef.ac.uk/FRAX/index.aspx>). The tool that will be  
21  
22 made from the results of this study will be modeled on this tool and presented with tablet and app  
23  
24 versions.  
25  
26  
27  
28  
29  
30

### 31 **AUTHORS' CONTRIBUTIONS**

32  
33 AB, YW, BL, MW, JB, JPAI, SBP, PC, IS, SG, ZI, DM, NM, RCZ, and BDT contributed  
34  
35 to the conception and design of the systematic review and meta-analysis. JB developed the  
36  
37 database search strategy. AB, YW, BL, MW, JB, and BDT will be involved in acquisition of  
38  
39 data. AB, YW, BL, and BDT will analyze the data. All authors will contribute to the  
40  
41 interpretation of results. AB, YW, and BDT drafted this protocol. All authors provided critical  
42  
43 revisions of the protocol and approved submission of the final manuscript. AB is the guarantor.  
44  
45  
46  
47  
48

### 49 **FUNDING STATEMENT**

50  
51 This research is supported by a grant from the Canadian Institutes of Health Research  
52  
53 (CIHR; Funding Reference Number PJT-156365; PIs = Benedetti, Thombs, Wilchesky). Drs.  
54  
55  
56  
57  
58

1  
2  
3 Benedetti and Thombs are supported by the Fonds de recherche du Québec - Santé (FRQS)  
4 researcher salary award. Dr. Wu is supported by an Utting Postdoctoral Fellowship from the  
5 Jewish General Hospital, Montreal, Quebec. Ms. Levis is supported by a CIHR Frederick  
6 Banting and Charles Best Canada Graduate Scholarship doctoral award. Dr. Patten is a Senior  
7 Health Scholar with Alberta Innovates, Health Solutions. Dr. Ismail receives funding from the  
8 Alzheimer Society Calgary via the Hotchkiss Brain Institute. Dr. Wilchesky is supported by the  
9 Donald Berman Maimonides Medical Research Foundation. No funding body had any input into  
10 any aspect of this protocol.  
11  
12  
13  
14  
15  
16  
17  
18  
19  
20  
21  
22  
23

#### 24 **COMPETING INTERESTS STATEMENT**

25  
26 The authors have read and understood the BMJ policy on declaration of interests and  
27 declare that they have no competing interests.  
28  
29  
30  
31  
32  
33  
34  
35  
36  
37  
38  
39  
40  
41  
42  
43  
44  
45  
46  
47  
48  
49  
50  
51  
52  
53  
54  
55  
56  
57  
58  
59  
60

**REFERENCES**

1. Fiske A, Wetherell JL, Gatz M. Depression in older adults. *Annu Rev Clin Psychol* 2009;5:363-89.
2. Luppá M, Sikorski C, Luck T, et al. Age- and gender-specific prevalence of depression in latest-life – Systematic review and meta-analysis. *J Affect Disord* 2012;136:212-221.
3. Duhoux A, Fournier L, Nguyen CT, Roberge P, Beveridge R. Guideline concordance of treatment for depressive disorders in Canada. *Soc Psychiatry Psychiatr Epidemiol* 2009;44:385-392.
4. Duhoux A, Fournier L, Gauvin L, Roberge P. What is the association between quality of treatment for depression and patient outcomes? A cohort study of adults consulting in primary care. *J Affect Disord* 2013;151:265-274.
5. Mojtabai R, Olfson M. Proportion of antidepressants prescribed without a psychiatric diagnosis is growing. *Health Aff* 2011;30:1434-1442.
6. Mojtabai R. Clinician-identified depression in community settings: Concordance with structured interview diagnoses. *Psychother Psychosom* 2013;82:161-169.
7. Olfson M, Blanco C, Marcus SC. Treatment of adult depression in the United States. *JAMA Intern Med* [Epub ahead of print].
8. Jeste DV, Alexopoulos GS, Bartels SJ, et al. Consensus statement on the upcoming crisis in geriatric mental health: research agenda for the next 2 decades. *Arch Gen Psychiatry* 1999;56:848-853.
9. Weeks R, Kalucy R, Hill J. Chapter 3: Depression in Elderly Patients. In: Jackson S, Jansen P, Mangoni A, eds. *Prescribing for Elderly Patients*. John Wiley & Sons, Ltd; 2009.

10. Registered Nurses Association of Ontario. *Screening for Delirium, Dementia, and Depression in Older Adults*. Toronto, Ontario: Registered Nurses Association of Ontario; 2003.
11. American Medical Directors Association (AMDA). *Depression in the long-term care setting*. Columbia, Maryland: American Medical Directors Association (AMDA); 2011.
12. American Geriatrics Society, American Association for Geriatric Psychiatry. Consensus statement on improving the quality of mental health care in U.S. nursing homes: management of depression and behavioral symptoms associated with dementia. *J Am Geriatr Soc*. 2003;51:1287-1298.
13. Buchanan D, Tourigny-Rivard M, Cappeliez P, et al. National guidelines for seniors' mental health: the assessment and treatment of depression. *Can J Geriatr* 2006;9:52-58.
14. Joffres M, Jaramillo A, Dickinson J, et al. Recommendations on screening for depression in adults. *CMAJ* 2013;185:775-782.
15. Mitchell AJ, Bird V, Rizzo M, et al. Which version of the geriatric depression scale is most useful in medical settings and nursing homes? Diagnostic validity meta-analysis. *Am J Geriatr Psychiatry* 2010;18:1066-1077.
16. Mitchell AJ, Bird V, Rizzo M, et al. Diagnostic validity and added value of the Geriatric Depression Scale for depression in primary care: a meta-analysis of GDS30 and GDS15. *J Affect Disord* 2010;125:10-17.
17. Montorio I, Izal M. The Geriatric Depression Scale: a review of its development and utility. *Int Psychogeriatr* 1996;8:103-112.

18. Pocklington C, Gilbody S, Manea L, McMillan D. The diagnostic accuracy of brief versions of the Geriatric Depression Scale: a systematic review and meta-analysis. *Int J Geriatr Psychiatry* 2016;31:837-857.
19. Riley RD, Lambert PC, Abo-Zaid G. Meta-analysis of individual participant data: rationale, conduct, and reporting. *BMJ* 2010;340:c221.
20. Stewart LA, Tierney JF, Clarke M. Chapter 18: Reviews of individual patient data. In: Higgins JPT, Green S, eds. *Cochrane Handbook for Systematic Reviews of Interventions*. Version 5.1.0. Chichester, England: Wiley-Blackwell; The Cochrane Collaboration 2011.
21. Jaspers GJ, Degraeuwe PLJ. A failed attempt to conduct an individual patient data meta-analysis. *Systematic Reviews* 2014;3:97.
22. Parish E, Bloom T, Godlee F. Statins for people at low risk. *BMJ* 2015;351:h3908.
23. Thombs BD, Benedetti A, Kloda LA, et al. The diagnostic accuracy of the Patient Health Questionnaire-2 (PHQ-2), Patient Health Questionnaire-8 (PHQ-8), and Patient Health Questionnaire-9 (PHQ-9) for detecting major depression: protocol for a systematic review and individual patient data meta-analyses. *Systematic Reviews* 2014;3:124.
24. Deeks JJ, Bossuyt PM, Gatsonis C. *Cochrane Handbook for Systematic Reviews of Diagnostic Test Accuracy Version 1.0.0*. The Cochrane Collaboration; 2009.
25. Higgins JPT, Green S. *Cochrane Handbook for Systematic Reviews of Interventions Version 5.1.0*. Chichester, England: Wiley-Blackwell; The Cochrane Collaboration 2011.
26. McInnes MD, Moher D, Thombs BD, et al. Preferred reporting items for a systematic review and meta-analysis of diagnostic test accuracy studies: the PRISMA-DTA statement. *JAMA* 2018; 319:388-96.

- 1  
2  
3 27. Stewart LA, Clarke M, Rovers M, et al. Preferred reporting items for a systematic review  
4 and meta-analysis of individual participant data: the PRISMA-IPD statement. *JAMA*  
5 2015;313:1657-65.  
6  
7  
8  
9  
10 28. Thombs BD, Benedetti A, Kloda LA, et al. The diagnostic accuracy of the Hospital  
11 Anxiety and Depression Scale (HADS) for detecting major depression: Protocol for a  
12 systematic review and individual patient data meta-analyses. *BMJ Open* 2016; 6:e011913.  
13  
14  
15  
16  
17 29. Thombs BD, Benedetti A, Kloda LA, et al. The diagnostic accuracy of the Edinburgh  
18 Postnatal Depression Scale (EPDS) for detecting major depression in pregnant and  
19 postnatal women: Protocol for a systematic Review and individual patient data meta-  
20 analyses. *BMJ Open* 2015;5:e009742.  
21  
22  
23  
24  
25  
26 30. McGowan J, Sampson M, Salzwedel DM, Cogo E, Foerster V, Lefebvre C. PRESS peer  
27 review of electronic search strategies: 2015 guideline statement. *J Clin Epidemiology*  
28 2016;75:40-6.  
29  
30  
31  
32  
33 31. Sampson M, Barrowman NJ, Moher D, et al. Should meta-analysts search Embase in  
34 addition to Medline? *J Clin Epidemiol* 2003;56:943-55.  
35  
36  
37  
38 32. Mann R, Gilbody SM. Should methodological filters for diagnostic test accuracy studies be  
39 used in systematic reviews of psychometric instruments? A case study involving screening  
40 for postnatal depression. *Syst Rev* 2012;1:9,4053-1-9.  
41  
42  
43  
44 33. Ingui BJ, Rogers MA. Searching for clinical prediction rules in MEDLINE. *J Am Med*  
45 *Inform Assoc* 2001;8:391-7.  
46  
47  
48  
49 34. Wong SS, Wilczynski NL, Haynes RB, et al. Developing optimal search strategies for  
50 detecting sound clinical prediction studies in MEDLINE. *AMIA Annu Symp Proc*  
51 2003:728-32.  
52  
53  
54  
55  
56  
57  
58  
59  
60

- 1  
2  
3 35. Whiting PF, Rutjes AW, Westwood ME, et al. QUADAS-2: a revised tool for the quality  
4 assessment of diagnostic accuracy studies. *Ann Intern Med* 2011;155:529-36.  
5  
6  
7 36. Riley RD, Dodd SR, Craig JV, et al. Meta-analysis of diagnostic test studies using  
8 individual patient data and aggregate data. *Stat Med* 2008;27:6111-36.  
9  
10  
11 37. Levis B, Benedetti A, Riehm KE, et al. Probability of major depression diagnostic  
12 classification using semi-structured versus fully structured diagnostic interviews. *Br J*  
13 *Psychiatry* 2018;212:377-85.  
14  
15  
16 38. Lecrubier Y, Sheehan DV, Weiller E et al. The Mini International Neuropsychiatric  
17 Interview (MINI). A short diagnostic structured interview: reliability and validity  
18 according to the CIDI. *Eur Psychiatry* 1997;12:224–231.  
19  
20  
21 39. Sheehan DV, Lecrubier Y, Sheehan KH et al. The validity of the Mini International  
22 Neuropsychiatric Interview (MINI) according to the SCID-P and its reliability. *Eur*  
23 *Psychiatry* 1997;12:232–241.  
24  
25  
26 40. Brugha TS, Jenkins R, Taub N, Meltzer H, Bebbington PE. A general population  
27 comparison of the Composite International Diagnostic Interview (CIDI) and the Schedules  
28 for Clinical Assessment in Neuropsychiatry (SCAN). *Psychol Medicine* 2001;31:1001–13.  
29  
30  
31 41. Brugha TS, Bebbington PE, Jenkins R. A difference that matters: comparisons of  
32 structured and semi-structured psychiatric diagnostic interviews in the general population.  
33 *Psychol Med* 1999;29:1013-20.  
34  
35  
36 42. Nosen E, Woody SR. Chapter 8: Diagnostic assessment in research. In, McKay D.  
37 *Handbook of research methods in abnormal and clinical psychology*. Sage; 2008.  
38  
39  
40 43. Kurdyak PA, Gnam WH. Small signal, big noise: performance of the CIDI depression  
41 module. *Can J Psychiatry* 2005;50:851-56.  
42  
43  
44  
45  
46  
47  
48  
49  
50  
51  
52  
53  
54  
55  
56  
57  
58  
59  
60



- 1  
2  
3 44. United Nations Development Programme. *Human Development Report 2013. The Rise of*  
4 *the South: Human Progress in a Diverse World*. New York, NY: United Nations  
5  
6 *Development Programme*; 2013.  
7  
8  
9  
10 45. Steyerberg EW. *Clinical Prediction Models*. New York: Springer; 2009.  
11  
12 46. Steyerberg EW, Vickers AJ, Cook NR, et al. Assessing the performance of prediction  
13 *models: a framework for some traditional and novel measures*. *Epidemiology* 2010;21:128-  
14 38.  
15  
16  
17  
18 47. Steyerberg EW, Harrell FE, Jr, Borsboom GJ, et al. Internal validation of predictive  
19 *models: efficiency of some procedures for logistic regression analysis*. *J Clin Epidemiol*  
20 2001;54:774-81.  
21  
22  
23  
24  
25 48. Dalton JE, Kattan MW. Recent advances in evaluating the prognostic value of a marker.  
26 *Scand J Clin Lab Invest* 2010; 242 (suppl):59–62.  
27  
28  
29  
30 49. Zhou Xh, McClish DK, Obuchowski NA. *Statistical Methods in Diagnostic Medicine*, 2<sup>nd</sup>  
31 ed. Wiley: Hoboken, NJ, 2011.  
32  
33  
34  
35 50. Harrell FE. *Regression Modeling Strategies: With Applications to Linear Models, Logistic*  
36 *Regression, and Survival Analysis*. Springer: New York, 2001  
37  
38  
39  
40 51. Pavlou M, Ambler G, Seaman S, Omar RZ. A note on obtaining correct marginal  
41 *predictions from a random intercepts model for binary outcomes*. *BMC Medical Research*  
42 *Methodology* 2015;15:59.  
43  
44  
45  
46 52. Skrondal A, Rabe-Hesketh S. Prediction in multilevel generalized linear models. *J R Statist*  
47 *Soc A* 2009;172:659-687.  
48  
49  
50  
51 53. Dobbins M, DeCorby K, Twiddy T. A knowledge transfer strategy for public health  
52 *decision makers*. *Worldviews Evid Based Nurs* 2004;1:120-8.  
53  
54  
55  
56  
57  
58  
59  
60

- 1  
2  
3 54. Graham ID, Logan J, Harrison MB, et al. Lost in knowledge translation: time for a map? *J*  
4 *Contin Educ Health Prof* 2006;26:13-24.  
5  
6  
7  
8 55. Haines A, Kuruvilla S, Borchert M. Bridging the implementation gap between knowledge  
9 and action for health. *Bull World Health Organ* 2004;82:724-31.  
10  
11  
12 56. Dobbins M, Thomas H, O'Brien MA, et al. Use of systematic reviews in the development  
13 of new provincial public health policies in Ontario. *Int J Technol Assess Health Care*  
14 2004;20:399-404.  
15  
16  
17  
18  
19 57. Dobbins M, Jack S, Thomas H, et al. Public health decision-makers' informational needs  
20 and preferences for receiving research evidence. *Worldviews Evid Based Nurs* 2007;4:156-  
21 63.  
22  
23  
24  
25  
26 58. Lavis J, Davies H, Oxman A, et al. Towards systematic reviews that inform health care  
27 management and policy-making. *J Health Serv Res Policy* 2005;10(Suppl 1):35-48.  
28  
29  
30  
31  
32  
33  
34  
35  
36  
37  
38  
39  
40  
41  
42  
43  
44  
45  
46  
47  
48  
49  
50  
51  
52  
53  
54  
55  
56  
57  
58  
59  
60

**SUPPLEMENTARY FILE 1: Search Strategies**

**GDS screening accuracy**

Researcher: Brett Thombs

Search strategy peer reviewed:

Database searches conducted:

Reference/related list searches conducted

| Search Terms                                                                                                                                                                                                                                                                                                                                                                                                                                                                                                                                                                       |                                                                                                                                                                                                                                                                                                                                                                                                                      |                                                                                                                                                                                                                                                                                                                                                  |
|------------------------------------------------------------------------------------------------------------------------------------------------------------------------------------------------------------------------------------------------------------------------------------------------------------------------------------------------------------------------------------------------------------------------------------------------------------------------------------------------------------------------------------------------------------------------------------|----------------------------------------------------------------------------------------------------------------------------------------------------------------------------------------------------------------------------------------------------------------------------------------------------------------------------------------------------------------------------------------------------------------------|--------------------------------------------------------------------------------------------------------------------------------------------------------------------------------------------------------------------------------------------------------------------------------------------------------------------------------------------------|
| GDS*<br>Geriatric Depression Scale*                                                                                                                                                                                                                                                                                                                                                                                                                                                                                                                                                |                                                                                                                                                                                                                                                                                                                                                                                                                      |                                                                                                                                                                                                                                                                                                                                                  |
| Search Terms:                                                                                                                                                                                                                                                                                                                                                                                                                                                                                                                                                                      |                                                                                                                                                                                                                                                                                                                                                                                                                      |                                                                                                                                                                                                                                                                                                                                                  |
| SCREENING ACCURACY                                                                                                                                                                                                                                                                                                                                                                                                                                                                                                                                                                 |                                                                                                                                                                                                                                                                                                                                                                                                                      |                                                                                                                                                                                                                                                                                                                                                  |
| Medline “filter”                                                                                                                                                                                                                                                                                                                                                                                                                                                                                                                                                                   | PsycINFO “filter”                                                                                                                                                                                                                                                                                                                                                                                                    | Web of Science “filter”                                                                                                                                                                                                                                                                                                                          |
| Mass Screening/<br>Psychiatric Status Rating Scales/<br>Predictive Value of Tests/<br>Reproducibility of Results/<br>Exp “Sensitivity and Specificity”/<br>Psychometrics/<br>Prevalence/<br>Reference Values/<br>Reference Standards/<br>Exp Diagnostic Errors/<br>Mental Disorders/diagnosis<br>Mood Disorders/diagnosis<br>Depressive Disorder/diagnosis<br>Depressive Disorder, Major/diagnosis<br>Depression, Postpartum/diagnosis<br>Depression/diagnosis<br><br>validation studies.pt.<br>comparative study.pt<br><br>screen*.af.<br>prevalence.af.<br>predictive value*.af. | Diagnosis/<br>Medical Diagnosis/<br>Psychodiagnosis/<br>Misdiagnosis/<br>Screening/<br>Health Screening/<br>Screening Tests/<br>Prediction/<br>Cutting Scores/<br>Psychometrics/<br>Test Validity/<br>screen*.af.<br>predictive value*.af.<br>detect*.ti.<br>sensitiv*.ti.<br>valid*.ti.<br>revalid*.ti.<br>accura*.ti.<br>psychometric*.ti.<br>specificit*.ab.<br>cut?off*.ab.<br>cut* score*.ab.<br>cut?point*.ab. | TS=<br>screen*<br>prevalence<br>“predictive value*”<br>detect*<br>sensitiv*<br>valid*<br>revalid*<br>predict*<br>accura*<br>psychometric*<br>identif* specificit*<br>cutoff*<br>“cut off*”<br>“cut* score*”<br>cutpoint*<br>“cut point*”<br>“threshold score*”<br>“reference standard*”<br>“reference test*”<br>“index test*”<br>“gold standard” |

|    |                         |                                      |
|----|-------------------------|--------------------------------------|
| 1  |                         |                                      |
| 2  |                         |                                      |
| 3  | detect*.ti.             | threshold score*.ab.                 |
| 4  | sensitiv*.ti.           | reference standard*.ab.              |
| 5  | valid*.ti.              | reference test*.ab.                  |
| 6  | revalid*.ti.            | index test*.ab                       |
| 7  | predict*.ti.            | gold standard.ab.                    |
| 8  | accura*.ti.             |                                      |
| 9  | psychometric*.ti.       | <del>Psychological Assessment/</del> |
| 10 | identif*.ti             | <del>Psychiatric Evaluation/</del>   |
| 11 | specificit*.ab.         | <del>Testing/</del>                  |
| 12 | cut?off*.ab.            | <del>Test Interpretation/</del>      |
| 13 | cut* score*.ab.         | <del>Rating Scales/</del>            |
| 14 | cut?point*.ab.          | prevalence.af.                       |
| 15 | threshold score*.ab.    | predict*.ti.                         |
| 16 | reference standard*.ab. | identif*.ti                          |
| 17 | reference test*.ab.     |                                      |
| 18 | index test*.ab.         |                                      |
| 19 | gold standard.ab.       |                                      |
| 20 |                         |                                      |
| 21 |                         |                                      |

### Diagnostic accuracy (prediction) filters:

Some diagnostic accuracy terms were adapted from the following 2 hedges, demonstrated to be the two best strategies in [Geersing GJ, Bouwmeester W, Zuithoff P, Spijker R, Leeftang M, Moons K. Search filters for finding prognostic and diagnostic prediction studies in medline to enhance systematic reviews. PLoS One; 2012;7(2):e32844 ]:

Ingui BJ, Rogers MA (2001) Searching for clinical prediction rules in MEDLINE. J Am Med Inform Assoc 8: 391–397.

Wong SS, Wilczynski NL, Haynes RB, Ramkissoonsingh R (2003) Developing optimal search strategies for detecting sound clinical prediction studies in MEDLINE. AMIA Annu Symp Proc 728–732.

**Searches conducted: <July 16, 2018>**

| Platform                                 | Databases(s)                                                                                                                                             | Results | Saved (account)       | Remarks                             |
|------------------------------------------|----------------------------------------------------------------------------------------------------------------------------------------------------------|---------|-----------------------|-------------------------------------|
| OvidSP                                   | Ovid MEDLINE(R), Ovid MEDLINE(R) In-Process & Other Non-Indexed Citations, Ovid MEDLINE(R) Daily and Ovid OLDMEDLINE(R) 1946 to Present (MEDLINE search) | 2960    | DepressionSR/ depress | Screening Accuracy— Rebuild AND GDS |
|                                          | PsycInfo                                                                                                                                                 | 5686    |                       |                                     |
| Clarivate                                | Web of Science                                                                                                                                           | 4166    |                       |                                     |
| Total database search results in EndNote |                                                                                                                                                          | 12812   |                       |                                     |
| <b>Total deduplicated in EndNote</b>     |                                                                                                                                                          |         |                       |                                     |

**De-Duplication using RefWorks: July 25<sup>th</sup>, 2018**

| Platform  | Database(s)                                                                                                                                              | Results (No. Of Citations) | After de-Duplication (No. of citations)                                                                                                                                                     | Saved (account)       | Remarks                             |
|-----------|----------------------------------------------------------------------------------------------------------------------------------------------------------|----------------------------|---------------------------------------------------------------------------------------------------------------------------------------------------------------------------------------------|-----------------------|-------------------------------------|
| OvidSP    | Ovid MEDLINE(R), Ovid MEDLINE(R) In-Process & Other Non-Indexed Citations, Ovid MEDLINE(R) Daily and Ovid OLDMEDLINE(R) 1946 to Present (MEDLINE search) | 2960                       | 2940 (Refworks shows 2972, which is not possible. Must be some error in RefWorks. 2940 was obtained by subtracting the no. of citation in psycInfo and WoS from the Total no. of citations) | DepressionSR/ depress | Screening Accuracy— Rebuild AND GDS |
|           | PsycInfo                                                                                                                                                 | 5686                       | 4648                                                                                                                                                                                        |                       |                                     |
| Clarivate | Web of Science                                                                                                                                           | 4166                       | 1876                                                                                                                                                                                        |                       |                                     |

|                                          |       |                                          |  |  |
|------------------------------------------|-------|------------------------------------------|--|--|
| Total database search results in EndNote | 12812 | 9464 (9496, if you calculate using 2972) |  |  |
|------------------------------------------|-------|------------------------------------------|--|--|

**NOTE: When the citations were uploaded onto the DEPRESSD – GDS account on Distiller SR, Distiller detected the overlap in citations between the different databases (i.e. MEDLINE, Psycinfo and WoS), which RefWorks was not able to detect (which had lead to the 2972 no. of citations in the MEDLINE folder in RefWorks and total number of citations to 9496) and skipped them. So the Total number of citation uploaded on DEPRESSD-GDS on Distiller is 9464.**

**NOTE: 30/07/2018 - De-Duplication - Before De-duplication in DistillerSR - 9464 citations.114 additional duplicates were removed by DistillerSR, leaving 9350 unique citations.**

Web of Science

TS=(screen\* OR prevalence OR "predictive value\*" OR detect\* OR sensitiv\* OR valid\* OR revalid\* OR predict\* OR accura\* OR psychometric\* OR identif\* OR specificit\* OR cutoff\* OR "cut off\*" OR "cut\* score\*" OR cutpoint\* OR "cut point\*" OR "threshold score\*" OR "reference standard\*" OR "reference test\*" OR "index test\*" OR "gold standard" OR "reliab\*")  
AND

TS=(GDS\* OR "Geriatric Depression Scale\*")

PsycInfo

|    |                                 |       |
|----|---------------------------------|-------|
| 1  | geriatric depression scale*.mp. | 8643  |
| 2  | GDS*.mp.                        | 1741  |
| 3  | 1 or 2                          | 9118  |
| 4  | Diagnosis/                      | 38494 |
| 5  | Medical Diagnosis/              | 6672  |
| 6  | Psychodiagnosis/                | 11207 |
| 7  | Misdiagnosis/                   | 515   |
| 8  | Screening/                      | 8719  |
| 9  | Health Screening/               | 2931  |
| 10 | Screening Tests/                | 4974  |
| 11 | Prediction/                     | 14366 |

|    |                                      |        |
|----|--------------------------------------|--------|
| 1  |                                      |        |
| 2  |                                      |        |
| 3  | 12 Cutting Scores/                   | 303    |
| 4  | 13 Psychometrics/                    | 51843  |
| 5  | 14 Test Validity/                    | 62121  |
| 6  | 15 screen*.af.                       | 246719 |
| 7  | 16 predictive value*.af.             | 30082  |
| 8  | 17 detect*.ti.                       | 14839  |
| 9  | 18 sensitiv*.ti.                     | 15767  |
| 10 | 19 valid*.ti.                        | 41010  |
| 11 | 20 revalid*.ti.                      | 47     |
| 12 | 21 accura*.ti.                       | 7580   |
| 13 | 22 psychometric*.ti.                 | 11717  |
| 14 | 23 specificit*.ab.                   | 30160  |
| 15 | 24 cut?off*.ab.                      | 5626   |
| 16 | 25 cut* score*.ab.                   | 2594   |
| 17 | 26 cut?point*.ab.                    | 265    |
| 18 | 27 threshold score*.ab.              | 174    |
| 19 | 28 reference standard*.ab.           | 502    |
| 20 | 29 reference test*.ab.               | 90     |
| 21 | 30 index test*.ab.                   | 73     |
| 22 | 31 gold standard.ab.                 | 4174   |
| 23 | 32 or/4-31                           | 453786 |
| 24 | 33 3 and 32                          | 5686   |
| 25 |                                      |        |
| 26 |                                      |        |
| 27 |                                      |        |
| 28 |                                      |        |
| 29 |                                      |        |
| 30 |                                      |        |
| 31 |                                      |        |
| 32 |                                      |        |
| 33 |                                      |        |
| 34 |                                      |        |
| 35 |                                      |        |
| 36 |                                      |        |
| 37 |                                      |        |
| 38 | MEDLINE                              |        |
| 39 | 1 Geriatric depression scale*.af.    |        |
| 40 | 2 GDS*.af.                           |        |
| 41 | 3 1 or 2                             |        |
| 42 | 4 Mass Screening/                    |        |
| 43 | 5 Psychiatric Status Rating Scales/  |        |
| 44 | 6 "Predictive Value of Tests"/       |        |
| 45 | 7 "Reproducibility of Results"/      |        |
| 46 | 8 exp "Sensitivity and Specificity"/ |        |
| 47 | 9 Psychometrics/                     |        |
| 48 | 10 Prevalence/                       |        |
| 49 | 11 Reference Values/                 |        |
| 50 |                                      |        |
| 51 |                                      |        |
| 52 |                                      |        |
| 53 |                                      |        |
| 54 |                                      |        |
| 55 |                                      |        |
| 56 |                                      |        |
| 57 |                                      |        |
| 58 |                                      |        |
| 59 |                                      |        |
| 60 |                                      |        |

1  
2  
3  
4  
5  
6  
7  
8  
9  
10  
11  
12  
13  
14  
15  
16  
17  
18  
19  
20  
21  
22  
23  
24  
25  
26  
27  
28  
29  
30  
31  
32  
33  
34  
35  
36  
37  
38  
39  
40  
41  
42  
43  
44  
45  
46  
47  
48  
49  
50  
51  
52  
53  
54  
55  
56  
57  
58  
59  
60

12 Reference Standards/  
13 exp Diagnostic Errors/  
14 validation studies.pt.  
15 comparative study.pt.  
16 screen\*.af.  
17 prevalence.af.  
18 predictive value\*.af.  
19 detect\*.ti.  
20 sensitiv\*.ti.  
21 valid\*.ti.  
22 revalid\*.ti.  
23 predict\*.ti.  
24 accura\*.ti.  
25 psychometric\*.ti.  
26 identif\*.ti.  
27 specificit\*.ab.  
28 cut?off\*.ab.  
29 cut\* score\*.ab.  
30 cut?point\*.ab.  
31 threshold score\*.ab.  
32 reference standard\*.ab.  
33 reference test\*.ab.  
34 index test\*.ab.  
35 gold standard.ab.  
36 Mental disorders/di, pc  
37 Mood disorders/di, pc  
38 depressive disorder/di, pc  
39 depressive disorder, major/di, pc  
40 depression, postpartum/di, pc  
41 depression/di, pc  
42 4 or 5 or 6 or 7 or 8 or 9 or 10 or 11 or 12 or 13 or 14 or 15 or 16 or 17 or 18 or 19 or 20 or 21  
43 42 or 22 or 23 or 24 or 25 or 26 or 27 or 28 or 29 or 30 or 31 or 32 or 33 or 34 or 35 or 36 or 37  
44 or 38 or 39 or 40 or 41  
45 43 3 and 42

For peer review only



## SUPPLEMENTARY FILE 2: Coding Manual

### Title/Abstract Screening

#### 1. Exclude if no original human data or it is a case study.

Exclude if it is clear from the title and abstract that the article is not an original report of primary data, but for example a letter, editorial, systematic review or meta-analysis, or if it is a case series or single case study. Studies reporting only on animal, cellular, or genetic data are also excluded. Studies that report results in conference abstracts are eligible for inclusion.

#### 2. Exclude if study did not involve administration of the GDS-30, GDS-15, GDS-5 or GDS-4.

Exclude if there is no mention in the title or abstract of any of these versions of the Geriatric Depression Scale (GDS).

#### 3. Exclude if there is no assessment of major depression.

Exclude studies if it is clear from the title and abstract that a clinical interview for depression was not conducted. Only studies that assess adults for a DSM diagnosis of current (30-day or actual presence) MDD/MDE or ICD diagnosis of a current major depressive episode will be included. Studies that include broader diagnostic categories, such as other depressive (e.g., minor depression, dysthymia) or anxiety disorders, are eligible for inclusion only if they may have separate classifications of adults with MDD or major depressive episode in the primary data. It is unlikely that studies can be excluded at the title/abstract level based on differential diagnosis (e.g., major versus major + minor depression).

#### 4. Exclude if studies do not use a validated diagnostic interview to assess major depression.

Only studies that assess adults for a DSM diagnosis of current (30-day or actual presence) MDD/MDE or ICD diagnosis of a current major depressive episode using a validated structured or semi-structured diagnostic interview will be included. Examples of validated diagnostic interviews and other assessment tools that are not validated diagnostic interviews are listed below. Studies that clearly only used a self-report questionnaire to classify patients as depressed are excluded. If studies appear to have conducted a clinical interview to diagnose depression based on the title/abstract review, but it is not clear if a validated diagnostic interview was used, they should be included for full-text review.

*Examples of validated diagnostic interviews:*

Composite International Diagnostic Interview (CIDI)

Diagnostic Interview Schedule (DIS)

1  
2  
3 Diagnostic Interview Schedule for Children (DISC)  
4 Diagnostisches Interview bei psychischen Störungen im Kindes (Kinder-DIPS)  
5 Mini-International Neuropsychiatric Interview (MINI)  
6 Schedule for Affective Disorders and Schizophrenia (SADS)  
7 Schedules for Clinical Assessment in Neuropsychiatry (SCAN)  
8 Structured Clinical Interview for DSM (SCID)  
9

10  
11 *Examples of assessment tools that are not validated diagnostic interviews:*

12 Any self-report measure completed by patients  
13 Hamilton Depression Rating Scale (HAM-D, HDRS)  
14 Montgomery Asberg Depression Rating Scale (MADRS)  
15 Primary Care Evaluation of Mental Disorders (PRIME-MD)  
16 WHO Major Depression Inventory  
17 International Diagnostic Checklist for ICD-10  
18  
19

20  
21 **5. Exclude if GDS and diagnostic interview not administered within 2 weeks of**  
22 **each other.**  
23

24 Studies are excluded if it is clear based on the title and abstract that the GDS and  
25 diagnostic interview were not administered within two weeks of one another, such as  
26 in a longitudinal study that administered one at one time point and the other at a  
27 different time point.  
28

29  
30 **6. Exclude if sample selection is based on the presence of distress or depression.**  
31

32 Studies of patients who are pre-selected as possibly distressed or depressed (e.g.,  
33 based on clinician's judgment or screening instrument cut-off) prior to administration  
34 of the study screening tool and diagnostic interview are excluded. Studies of patients  
35 receiving psychiatric treatment or with psychiatric diagnoses are excluded with the  
36 exception of studies of substance or alcohol abuse patients. Studies in which only  
37 part of the sample is selected based on distress or depression may be eligible if data  
38 for patients not selected due to distress levels can be obtained. If only patients above  
39 a cutoff score on the GDS are administered the diagnostic interview, the study is  
40 excluded. If, however, a proportion of patients both above and below the GDS cutoff  
41 are administered the interview, the study would be included.  
42  
43

44  
45 **7. Exclude if not adults.**  
46

47 Studies are excluded if it is clear from the title/abstract that the study sample does  
48 not include adults aged 18 and over. Studies with mixed population samples are  
49 eligible for inclusion if data for adults can be obtained. However, studies that assess  
50 only pediatric, adolescent, school or undergraduate samples will not be included,  
51 even if some participants are at least 18 years old.  
52  
53  
54  
55  
56  
57  
58  
59  
60

## Full Text Review

### 1. Exclude if no original human data or it is a case study.

Exclude if the article is not an original report of primary data, but for example a letter, editorial, systematic review or meta-analysis, or it is a case series or single case study. Studies reporting only on animal, cellular, or genetic data are also excluded. Studies that report results in conference abstracts are eligible for inclusion.

### 2. Exclude if study did not involve administration of the GDS-30, GDS-15, GDS-5 or GDS-4.

Exclude if patients were not administered the GDS-30, GDS-15, GDS-5 or GDS-4.

### 3. Exclude if there is no assessment of major depression.

Exclude studies if there is not a clinical interview to diagnose current (30-day or actual) MDD based on DSM or a current major depressive episode based on ICD. Studies that include broader diagnostic categories, such as other depressive (e.g., minor depression, dysthymia) or anxiety disorders, are eligible for inclusion only if they have classified adults with MDD or major depressive episode in the primary data.

*Examples of inclusion / exclusion of different depression diagnoses:*

#### **DSM-IV-TR:**

Include: Major Depression.

Exclude: Dysthymic Disorder, Minor Depression (at least two depressive symptoms are present for two weeks).

#### **ICD-10:**

Include: mild, moderate, severe, recurrent depressive episodes.

Exclude: recurrent brief depressive disorder (requires a depressive episode with symptomatic criteria, but lasting less than 2 weeks and requires that the episodes occur at least once per month for 12 consecutive months).

#### **RESEARCH DIAGNOSTIC CRITERIA (RDC):**

Include: Major Depressive Disorder.

#### **DSM-III:**

Include: Major depression.

Exclude: Dysthymic Disorder, atypical affective disorders.

### 4. Exclude if studies do not use a validated diagnostic interview to assess major depression.

Only studies that assess adults for a DSM diagnosis of current (30-day or actual

presence) MDD or ICD diagnosis of a current major depressive episode using a validated structured or semi-structured diagnostic interview will be included. Examples of validated diagnostic interviews and other assessment tools that are not validated diagnostic interviews are listed below. Studies that clearly only used a self-report questionnaire to classify patients as depressed are excluded.

*Examples of validated diagnostic interviews:*

Composite International Diagnostic Interview (CIDI)  
Diagnostic Interview Schedule (DIS)  
Diagnostic Interview Schedule for Children (DISC)  
Diagnostisches Interview bei psychischen Störungen im Kindes (Kinder-DIPS)  
Mini-International Neuropsychiatric Interview (MINI)  
Schedule for Affective Disorders and Schizophrenia (SADS)  
Schedules for Clinical Assessment in Neuropsychiatry (SCAN)  
Structured Clinical Interview for DSM (SCID)

*Examples of assessment tools that are not validated diagnostic interviews:*

Any self-report measure completed by patients  
Hamilton Depression Rating Scale (HAM-D, HDRS)  
Montgomery Asberg Depression Rating Scale (MADRS)  
Primary Care Evaluation of Mental Disorders (PRIME-MD)  
International Diagnostic Checklist for ICD-10

**5. Exclude if GDS and diagnostic interview not administered within 2 weeks of each other.**

Studies are excluded if the GDS and diagnostic interview were not administered within two weeks of one another. Datasets where some patients were administered the screening tools within 2 weeks of the diagnostic interview and some patients were not will be included if the original data allows us to select patients administered the diagnostic interview and screening tools within the two-week window.

**6. Exclude if sample selection is based on the presence of distress or depression.**

Studies of patients who are pre-selected as possibly distressed or depressed (e.g., based on clinician's judgment or screening instrument cut-off) prior to administration of the study screening tool and diagnostic interview are excluded. Studies of patients receiving psychiatric treatment or with psychiatric diagnoses are excluded with the exception of studies of substance or alcohol abuse patients. Studies in which only part of the sample is selected based on distress or depression may be eligible if data for patients not selected due to distress levels can be obtained. If only patients above a cutoff score on the GDS are administered the diagnostic interview, the study is excluded. If, however, a proportion of patients both above and below the GDS cutoff are administered the interview, the study would be included.

**7. Exclude if not adults.**

1  
2  
3  
4 Studies are excluded if the study sample does not include adults aged 18 and over.  
5 Studies with mixed population samples are eligible for inclusion if data for adults  
6 can be obtained. However, studies that assess only pediatric, adolescent, school or  
7 undergraduate samples will not be included, even if some participants are at least 18  
8 years old.  
9  
10  
11  
12  
13  
14  
15  
16  
17  
18  
19  
20  
21  
22  
23  
24  
25  
26  
27  
28  
29  
30  
31  
32  
33  
34  
35  
36  
37  
38  
39  
40  
41  
42  
43  
44  
45  
46  
47  
48  
49  
50  
51  
52  
53  
54  
55  
56  
57  
58  
59  
60

For peer review only

1  
2  
3 **SUPPLEMENTARY FILE 3: Draft Flow Diagram of Study Selection Process**  
4  
5

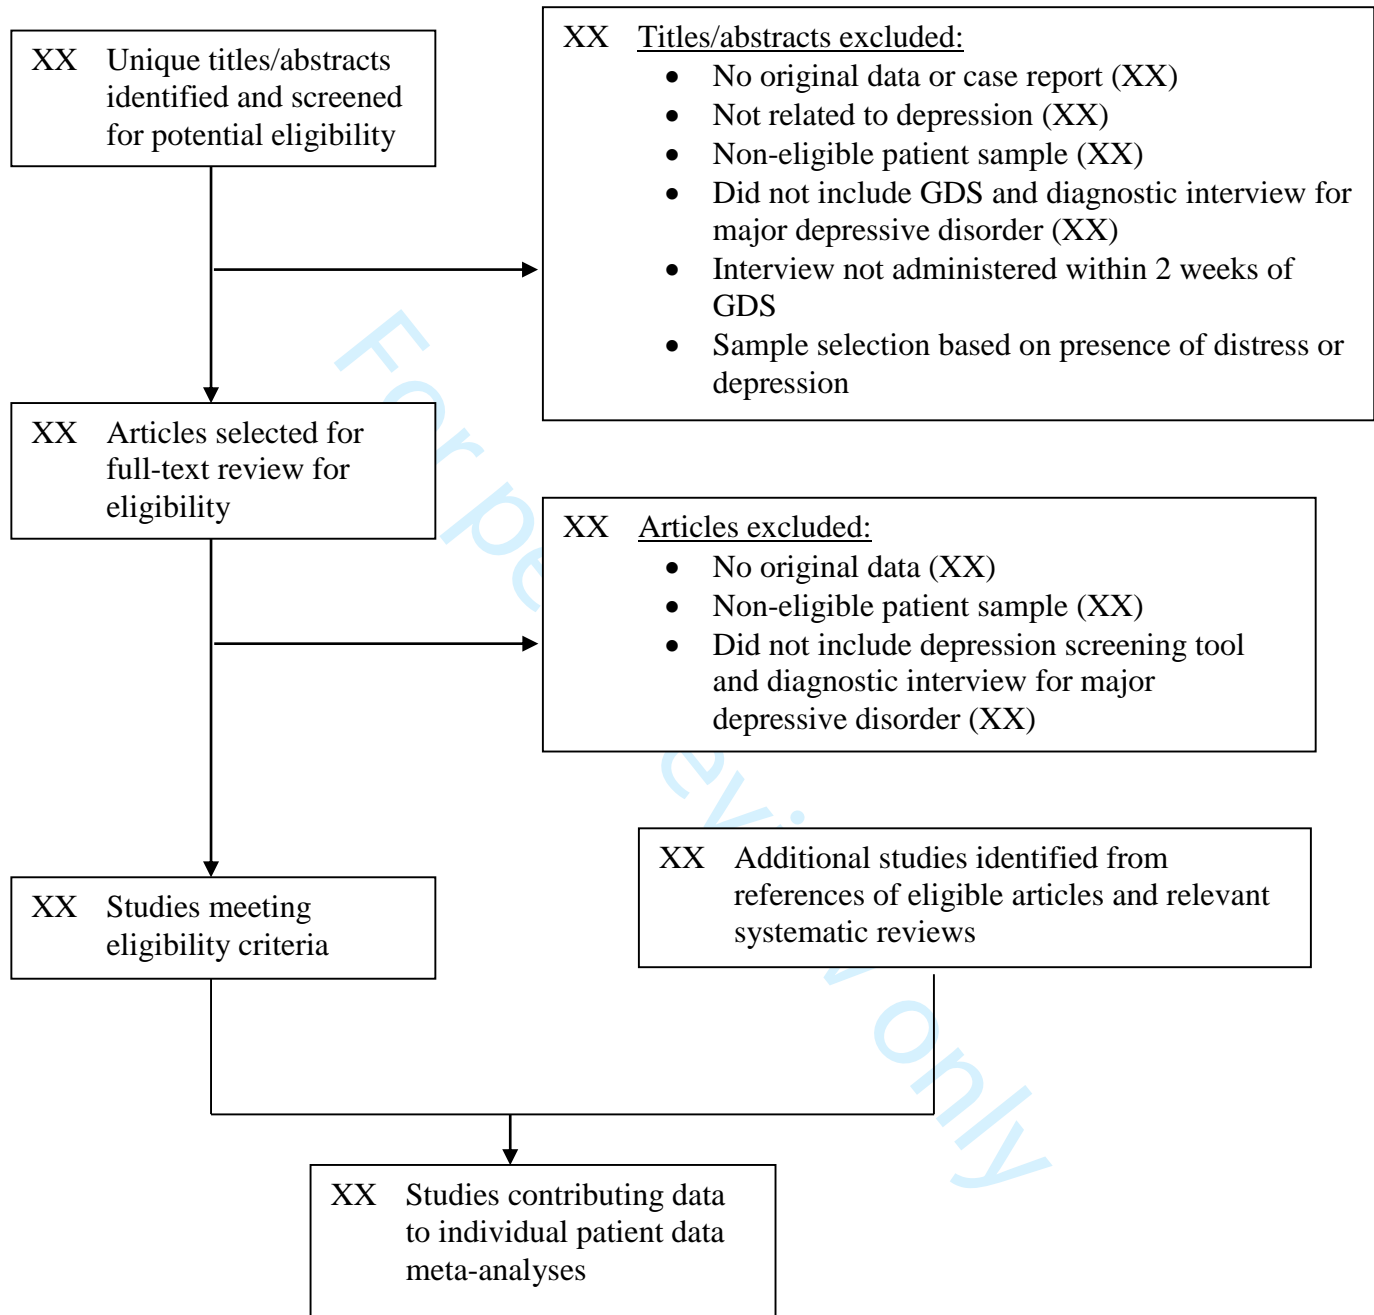

**PRISMA-P (Preferred Reporting Items for Systematic review and Meta-Analysis Protocols) 2015 checklist: recommended items to address in a systematic review protocol\***

| Section and topic                 | Item No | Page No | Checklist item                                                                                                                                                                                                                |
|-----------------------------------|---------|---------|-------------------------------------------------------------------------------------------------------------------------------------------------------------------------------------------------------------------------------|
| <b>ADMINISTRATIVE INFORMATION</b> |         |         |                                                                                                                                                                                                                               |
| Title:                            |         |         |                                                                                                                                                                                                                               |
| Identification                    | 1a      | 1       | Identify the report as a protocol of a systematic review                                                                                                                                                                      |
| Update                            | 1b      | N/A     | If the protocol is for an update of a previous systematic review, identify as such                                                                                                                                            |
| Registration                      | 2       | 4       | If registered, provide the name of the registry (such as PROSPERO) and registration number                                                                                                                                    |
| Authors:                          |         |         |                                                                                                                                                                                                                               |
| Contact                           | 3a      | 1-2     | Provide name, institutional affiliation, e-mail address of all protocol authors; provide physical mailing address of corresponding author                                                                                     |
| Contributions                     | 3b      | 16      | Describe contributions of protocol authors and identify the guarantor of the review                                                                                                                                           |
| Amendments                        | 4       | 9       | If the protocol represents an amendment of a previously completed or published protocol, identify as such and list changes; otherwise, state plan for documenting important protocol amendments                               |
| Support:                          |         |         |                                                                                                                                                                                                                               |
| Sources                           | 5a      | 16      | Indicate sources of financial or other support for the review                                                                                                                                                                 |
| Sponsor                           | 5b      | 16      | Provide name for the review funder and/or sponsor                                                                                                                                                                             |
| Role of sponsor or funder         | 5c      | 16-17   | Describe roles of funder(s), sponsor(s), and/or institution(s), if any, in developing the protocol                                                                                                                            |
| <b>INTRODUCTION</b>               |         |         |                                                                                                                                                                                                                               |
| Rationale                         | 6       | 6-8     | Describe the rationale for the review in the context of what is already known                                                                                                                                                 |
| Objectives                        | 7       | 8       | Provide an explicit statement of the question(s) the review will address with reference to participants, interventions, comparators, and outcomes (PICO)                                                                      |
| <b>METHODS</b>                    |         |         |                                                                                                                                                                                                                               |
| Eligibility criteria              | 8       | 10-11   | Specify the study characteristics (such as PICO, study design, setting, time frame) and report characteristics (such as years considered, language, publication status) to be used as criteria for eligibility for the review |
| Information sources               | 9       | 9-10    | Describe all intended information sources (such as electronic databases, contact with study authors, trial registers or other grey literature sources) with planned dates of coverage                                         |
| Search strategy                   | 10      | 24-29   | Present draft of search strategy to be used for at least one electronic database, including planned limits, such that it could be repeated                                                                                    |
| Study records:                    |         |         |                                                                                                                                                                                                                               |
| Data                              | 11a     | 11-12   | Describe the mechanism(s) that will be used to manage records and data throughout the review                                                                                                                                  |

|                                    |     |       |                                                                                                                                                                                                                                                  |  |
|------------------------------------|-----|-------|--------------------------------------------------------------------------------------------------------------------------------------------------------------------------------------------------------------------------------------------------|--|
| management                         |     |       |                                                                                                                                                                                                                                                  |  |
| Selection process                  | 11b | 10-11 | State the process that will be used for selecting studies (such as two independent reviewers) through each phase of the review (that is, screening, eligibility and inclusion in meta-analysis)                                                  |  |
| Data collection process            | 11c | 11-12 | Describe planned method of extracting data from reports (such as piloting forms, done independently, in duplicate), any processes for obtaining and confirming data from investigators                                                           |  |
| Data items                         | 12  | 13-14 | List and define all variables for which data will be sought (such as PICO items, funding sources), any pre-planned data assumptions and simplifications                                                                                          |  |
| Outcomes and prioritization        | 13  | 12-15 | List and define all outcomes for which data will be sought, including prioritization of main and additional outcomes, with rationale                                                                                                             |  |
| Risk of bias in individual studies | 14  | 12    | Describe anticipated methods for assessing risk of bias of individual studies, including whether this will be done at the outcome or study level, or both; state how this information will be used in data synthesis                             |  |
| Data synthesis                     | 15a | 11-12 | Describe criteria under which study data will be quantitatively synthesised                                                                                                                                                                      |  |
|                                    | 15b | 12-15 | If data are appropriate for quantitative synthesis, describe planned summary measures, methods of handling data and methods of combining data from studies, including any planned exploration of consistency (such as $I^2$ , Kendall's $\tau$ ) |  |
|                                    | 15c | 12-14 | Describe any proposed additional analyses (such as sensitivity or subgroup analyses, meta-regression)                                                                                                                                            |  |
|                                    | 15d | N/A   | If quantitative synthesis is not appropriate, describe the type of summary planned                                                                                                                                                               |  |
| Meta-bias(es)                      | 16  | N/A   | Specify any planned assessment of meta-bias(es) (such as publication bias across studies, selective reporting within studies)                                                                                                                    |  |
| Confidence in cumulative evidence  | 17  | N/A   | Describe how the strength of the body of evidence will be assessed (such as GRADE)                                                                                                                                                               |  |

**\* It is strongly recommended that this checklist be read in conjunction with the PRISMA-P Explanation and Elaboration (cite when available) for important clarification on the items. Amendments to a review protocol should be tracked and dated. The copyright for PRISMA-P (including checklist) is held by the PRISMA-P Group and is distributed under a Creative Commons Attribution Licence 4.0.**

*From: Shamseer L, Moher D, Clarke M, Ghersi D, Liberati A, Petticrew M, Shekelle P, Stewart L, PRISMA-P Group. Preferred reporting items for systematic review and meta-analysis protocols (PRISMA-P) 2015: elaboration and explanation. BMJ. 2015 Jan 2;349(jan02 1):g7647.*
