# Supplementary material for: Diagnostic accuracy of the Geriatric Depression Scale-30, Geriatric Depression Scale-15, Geriatric Depression Scale-5 and Geriatric Depression Scale-4 for detecting major depression: protocol for a systematic review and individual participant data meta-analysis
Source: PubMed Central journal article supplement — BMJ Open. 2018 Dec 4;8(12):e026598. doi: 10.1136/bmjopen-2018-026598 (PMC6286470; doi:10.1136/bmjopen-2018-026598), 2018-12-04
Supplement: bmjopen-2018-026598.reviewer_comments.pdf [file bmjopen-2018-026598.reviewer_comments.pdf]

## PEER REVIEW HISTORY

BMJ Open publishes all reviews undertaken for accepted manuscripts. Reviewers are asked to complete a checklist review form (<http://bmjopen.bmj.com/site/about/resources/checklist.pdf>) and are provided with free text boxes to elaborate on their assessment. These free text comments are reproduced below.

## ARTICLE DETAILS

|                            |                                                                                                                                                                                                                                                                        |
|----------------------------|------------------------------------------------------------------------------------------------------------------------------------------------------------------------------------------------------------------------------------------------------------------------|
| <b>TITLE (PROVISIONAL)</b> | Diagnostic Accuracy of the Geriatric Depression Scale-30, Geriatric Depression Scale-15, Geriatric Depression Scale-5, and Geriatric Depression Scale-4 for Detecting Major Depression: Protocol for a Systematic Review and Individual Participant Data Meta-Analysis |
| <b>AUTHORS</b>             | Thombs, Brett; Benedetti, Andrea; Wu, Yin; Levis, Brooke; Wilchesky, Machele; Boruff, Jill; Ioannidis, John; Patten, Scott; Cuijpers, Pim; Shrier, Ian; Gilbody, Simon; Ismail, Zahinoor; McMillan, Dean; Mitchell, Nicholas; Ziegelstein, Roy                         |

This article was not externally reviewed at BMJ Open. Protocols that have been independently assessed prior to submission to BMJ Open are usually fast-tracked to publication on the grounds that further substantial changes will not be possible. This independent assessment will usually be external, independent review for both a substantial grant award from a non-commercial or government funder and ethics approval.
