# Supplementary material for: Diagnostic accuracy of the Geriatric Depression Scale-30, Geriatric Depression Scale-15, Geriatric Depression Scale-5 and Geriatric Depression Scale-4 for detecting major depression: protocol for a systematic review and individual participant data meta-analysis
Source: PubMed Central journal article supplement — BMJ Open. 2018 Dec 4;8(12):e026598. doi: 10.1136/bmjopen-2018-026598 (PMC6286470; doi:10.1136/bmjopen-2018-026598), 2018-12-04
Supplement: bmjopen-2018-026598supp001.pdf [file bmjopen-2018-026598supp001.pdf]

## SUPPLEMENTARY FILE 1: Search Strategies

### GDS screening accuracy

Researcher: Brett Thombs

Search strategy peer reviewed:

Database searches conducted:

Reference/related list searches conducted

| Search Terms                                                                                                                                                                                                                                                                                                                                                                                                                                                                                                                                                                       |                                                                                                                                                                                                                                                                                                                                                                                                                     |                                                                                                                                                                                                                                                                                                                                                 |
|------------------------------------------------------------------------------------------------------------------------------------------------------------------------------------------------------------------------------------------------------------------------------------------------------------------------------------------------------------------------------------------------------------------------------------------------------------------------------------------------------------------------------------------------------------------------------------|---------------------------------------------------------------------------------------------------------------------------------------------------------------------------------------------------------------------------------------------------------------------------------------------------------------------------------------------------------------------------------------------------------------------|-------------------------------------------------------------------------------------------------------------------------------------------------------------------------------------------------------------------------------------------------------------------------------------------------------------------------------------------------|
| GDS*<br>Geriatric Depression Scale*                                                                                                                                                                                                                                                                                                                                                                                                                                                                                                                                                |                                                                                                                                                                                                                                                                                                                                                                                                                     |                                                                                                                                                                                                                                                                                                                                                 |
| Search Terms:                                                                                                                                                                                                                                                                                                                                                                                                                                                                                                                                                                      |                                                                                                                                                                                                                                                                                                                                                                                                                     |                                                                                                                                                                                                                                                                                                                                                 |
| SCREENING ACCURACY                                                                                                                                                                                                                                                                                                                                                                                                                                                                                                                                                                 |                                                                                                                                                                                                                                                                                                                                                                                                                     |                                                                                                                                                                                                                                                                                                                                                 |
| Medline “filter”                                                                                                                                                                                                                                                                                                                                                                                                                                                                                                                                                                   | PsycINFO “filter”                                                                                                                                                                                                                                                                                                                                                                                                   | Web of Science “filter”                                                                                                                                                                                                                                                                                                                         |
| Mass Screening/<br>Psychiatric Status Rating Scales/<br>Predictive Value of Tests/<br>Reproducibility of Results/<br>Exp “Sensitivity and Specificity”/<br>Psychometrics/<br>Prevalence/<br>Reference Values/<br>Reference Standards/<br>Exp Diagnostic Errors/<br>Mental Disorders/diagnosis<br>Mood Disorders/diagnosis<br>Depressive Disorder/diagnosis<br>Depressive Disorder, Major/diagnosis<br>Depression, Postpartum/diagnosis<br>Depression/diagnosis<br><br>validation studies.pt.<br>comparative study.pt<br><br>screen*.af.<br>prevalence.af.<br>predictive value*.af. | Diagnosis/<br>Medical Diagnosis/<br>Psychodiagnosis/<br>Misdiagnosis/<br>Screening/<br>Health Screening/<br>Screening Tests/<br>Prediction/<br>Cutting Scores/<br>Psychometrics/<br>Test Validity/<br>screen*.af.<br>predictive value*.af.<br>detect*.ti.<br>sensitiv*.ti.<br>valid*.ti.<br>revalid*.ti.<br>accur*.ti.<br>psychometric*.ti.<br>specificit*.ab.<br>cut?off*.ab.<br>cut* score*.ab.<br>cut?point*.ab. | TS=<br>screen*<br>prevalence<br>“predictive value*”<br>detect*<br>sensitiv*<br>valid*<br>revalid*<br>predict*<br>accur*<br>psychometric*<br>identif* specificit*<br>cutoff*<br>“cut off*”<br>“cut* score*”<br>cutpoint*<br>“cut point*”<br>“threshold score*”<br>“reference standard*”<br>“reference test*”<br>“index test*”<br>“gold standard” |

|                         |                                      |
|-------------------------|--------------------------------------|
| detect*.ti.             | threshold score*.ab.                 |
| sensitiv*.ti.           | reference standard*.ab.              |
| valid*.ti.              | reference test*.ab.                  |
| revalid*.ti.            | index test*.ab                       |
| predict*.ti.            | gold standard.ab.                    |
| accura*.ti.             |                                      |
| psychometric*.ti.       | <del>Psychological Assessment/</del> |
| identif*.ti             | <del>Psychiatric Evaluation/</del>   |
| specificit*.ab.         | <del>Testing/</del>                  |
| cut?off*.ab.            | <del>Test Interpretation/</del>      |
| cut* score*.ab.         | <del>Rating Scales/</del>            |
| cut?point*.ab.          | prevalence.af.                       |
| threshold score*.ab.    | predict*.ti.                         |
| reference standard*.ab. | identif*.ti                          |
| reference test*.ab.     |                                      |
| index test*.ab.         |                                      |
| gold standard.ab.       |                                      |

**Diagnostic accuracy (prediction) filters:**

Some diagnostic accuracy terms were adapted from the following 2 hedges, demonstrated to be the two best strategies in [Geersing GJ, Bouwmeester W, Zuithoff P, Spijker R, Leeflang M, Moons K. Search filters for finding prognostic and diagnostic prediction studies in medline to enhance systematic reviews. PLoS One; 2012;7(2):e32844 ]:

Ingui BJ, Rogers MA (2001) Searching for clinical prediction rules in MEDLINE. J Am Med Inform Assoc 8: 391–397.

Wong SS, Wilczynski NL, Haynes RB, Ramkissoonsingh R (2003) Developing optimal search strategies for detecting sound clinical prediction studies in MEDLINE. AMIA Annu Symp Proc 728–732.

**Searches conducted: <July 16, 2018>**

| Platform                                 | Databases(s)                                                                                                                                             | Results | Saved (account)       | Remarks                             |
|------------------------------------------|----------------------------------------------------------------------------------------------------------------------------------------------------------|---------|-----------------------|-------------------------------------|
| OvidSP                                   | Ovid MEDLINE(R), Ovid MEDLINE(R) In-Process & Other Non-Indexed Citations, Ovid MEDLINE(R) Daily and Ovid OLDMEDLINE(R) 1946 to Present (MEDLINE search) | 2960    | DepressionSR/ depress | Screening Accuracy— Rebuild AND GDS |
|                                          | PsycInfo                                                                                                                                                 | 5686    |                       |                                     |
| Clarivate                                | Web of Science                                                                                                                                           | 4166    |                       |                                     |
| Total database search results in EndNote |                                                                                                                                                          | 12812   |                       |                                     |
| <b>Total deduplicated in EndNote</b>     |                                                                                                                                                          |         |                       |                                     |

**De-Duplication using RefWorks: July 25<sup>th</sup>, 2018**

| Platform  | Database(s)                                                                                                                                              | Results (No. Of Citations) | After de-Duplication (No. of citations)                                                                                                                                                     | Saved (account)       | Remarks                             |
|-----------|----------------------------------------------------------------------------------------------------------------------------------------------------------|----------------------------|---------------------------------------------------------------------------------------------------------------------------------------------------------------------------------------------|-----------------------|-------------------------------------|
| OvidSP    | Ovid MEDLINE(R), Ovid MEDLINE(R) In-Process & Other Non-Indexed Citations, Ovid MEDLINE(R) Daily and Ovid OLDMEDLINE(R) 1946 to Present (MEDLINE search) | 2960                       | 2940 (Refworks shows 2972, which is not possible. Must be some error in RefWorks. 2940 was obtained by subtracting the no. of citation in psycInfo and WoS from the Total no. of citations) | DepressionSR/ depress | Screening Accuracy— Rebuild AND GDS |
|           | PsycInfo                                                                                                                                                 | 5686                       | 4648                                                                                                                                                                                        |                       |                                     |
| Clarivate | Web of Science                                                                                                                                           | 4166                       | 1876                                                                                                                                                                                        |                       |                                     |

|                                          |       |                                          |  |  |
|------------------------------------------|-------|------------------------------------------|--|--|
| Total database search results in EndNote | 12812 | 9464 (9496, if you calculate using 2972) |  |  |
|------------------------------------------|-------|------------------------------------------|--|--|

**NOTE: When the citations were uploaded onto the DEPRESSD – GDS account on Distiller SR, Distiller detected the overlap in citations between the different databases (i.e. MEDLINE, Psycinfo and WoS), which RefWorks was not able to detect (which had lead to the 2972 no. of citations in the MEDLINE folder in RefWorks and total number of citations to 9496) and skipped them. So the Total number of citation uploaded on DEPRESSD-GDS on Distiller is 9464.**

**NOTE: 30/07/2018 - De-Duplication - Before De-duplication in DistillerSR - 9464 citations.114 additional duplicates were removed by DistillerSR, leaving 9350 unique citations.**

Web of Science

TS=(screen\* OR prevalence OR "predictive value\*" OR detect\* OR sensitiv\* OR valid\* OR revalid\* OR predict\* OR accura\* OR psychometric\* OR identif\* OR specificit\* OR cutoff\* OR "cut off\*" OR "cut\* score\*" OR cutpoint\* OR "cut point\*" OR "threshold score\*" OR "reference standard\*" OR "reference test\*" OR "index test\*" OR "gold standard" OR "reliab\*")  
AND

TS=(GDS\* OR “Geriatric Depression Scale\*”)

PsycInfo

- 1 geriatric depression scale\*.mp. 8643
- 2 GDS\*.mp. 1741
- 3 1 or 2 9118
- 4 Diagnosis/ 38494
- 5 Medical Diagnosis/ 6672
- 6 Psychodiagnosis/ 11207
- 7 Misdiagnosis/ 515
- 8 Screening/ 8719
- 9 Health Screening/ 2931
- 10 Screening Tests/ 4974
- 11 Prediction/ 14366

|                            |        |
|----------------------------|--------|
| 12 Cutting Scores/         | 303    |
| 13 Psychometrics/          | 51843  |
| 14 Test Validity/          | 62121  |
| 15 screen*.af.             | 246719 |
| 16 predictive value*.af.   | 30082  |
| 17 detect*.ti.             | 14839  |
| 18 sensitiv*.ti.           | 15767  |
| 19 valid*.ti.              | 41010  |
| 20 revalid*.ti.            | 47     |
| 21 accura*.ti.             | 7580   |
| 22 psychometric*.ti.       | 11717  |
| 23 specificit*.ab.         | 30160  |
| 24 cut?off*.ab.            | 5626   |
| 25 cut* score*.ab.         | 2594   |
| 26 cut?point*.ab.          | 265    |
| 27 threshold score*.ab.    | 174    |
| 28 reference standard*.ab. | 502    |
| 29 reference test*.ab.     | 90     |
| 30 index test*.ab.         | 73     |
| 31 gold standard.ab.       | 4174   |
| 32 or/4-31                 | 453786 |
| 33 3 and 32                | 5686   |

#### MEDLINE

- 1 Geriatric depression scale\*.af.
- 2 GDS\*.af.
- 3 1 or 2
- 4 Mass Screening/
- 5 Psychiatric Status Rating Scales/
- 6 "Predictive Value of Tests"/
- 7 "Reproducibility of Results"/
- 8 exp "Sensitivity and Specificity"/
- 9 Psychometrics/
- 10 Prevalence/
- 11 Reference Values/

- 12 Reference Standards/
- 13 exp Diagnostic Errors/
- 14 validation studies.pt.
- 15 comparative study.pt.
- 16 screen\*.af.
- 17 prevalence.af.
- 18 predictive value\*.af.
- 19 detect\*.ti.
- 20 sensitiv\*.ti.
- 21 valid\*.ti.
- 22 revalid\*.ti.
- 23 predict\*.ti.
- 24 accura\*.ti.
- 25 psychometric\*.ti.
- 26 identif\*.ti.
- 27 specificit\*.ab.
- 28 cut?off\*.ab.
- 29 cut\* score\*.ab.
- 30 cut?point\*.ab.
- 31 threshold score\*.ab.
- 32 reference standard\*.ab.
- 33 reference test\*.ab.
- 34 index test\*.ab.
- 35 gold standard.ab.
- 36 Mental disorders/di, pc
- 37 Mood disorders/di, pc
- 38 depressive disorder/di, pc
- 39 depressive disorder, major/di, pc
- 40 depression, postpartum/di, pc
- 41 depression/di, pc
- 4 or 5 or 6 or 7 or 8 or 9 or 10 or 11 or 12 or 13 or 14 or 15 or 16 or 17 or 18 or 19 or 20 or 21
- 42 or 22 or 23 or 24 or 25 or 26 or 27 or 28 or 29 or 30 or 31 or 32 or 33 or 34 or 35 or 36 or 37
- or 38 or 39 or 40 or 41
- 43 3 and 42
