# Supplementary figures and images for: Diagnostic accuracy of the Geriatric Depression Scale-30, Geriatric Depression Scale-15, Geriatric Depression Scale-5 and Geriatric Depression Scale-4 for detecting major depression: protocol for a systematic review and individual participant data meta-analysis
Source: PubMed Central journal article supplement — BMJ Open. 2018 Dec 4;8(12):e026598. doi: 10.1136/bmjopen-2018-026598 (PMC6286470; doi:10.1136/bmjopen-2018-026598), 2018-12-04

**SUPPLEMENTARY FILE 3: Draft Flow Diagram of Study Selection Process**

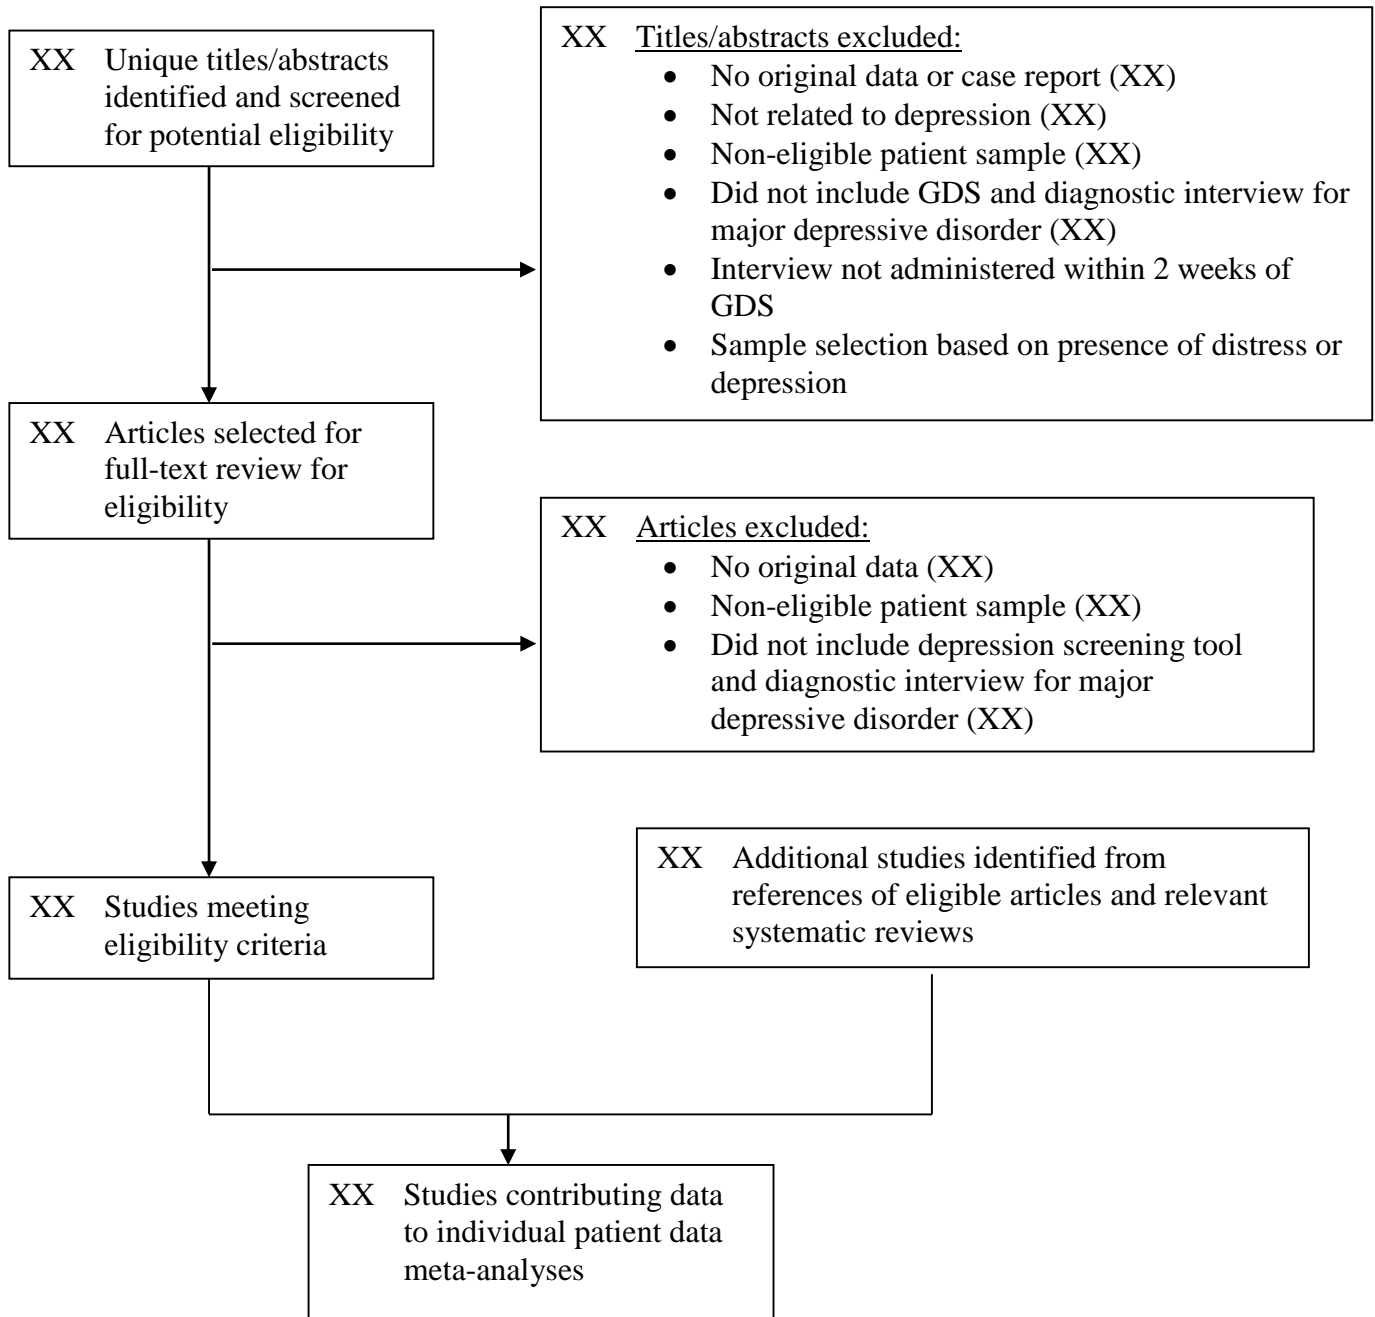

Supplement: bmjopen-2018-026598supp003.pdf [file bmjopen-2018-026598supp003.pdf]
